# Supplementary material for: How Turbulence Brings Benefit: The Influence of Dynamic Team Environment on Entrepreneurial Team Innovation
Source: Front Psychol. 2020 May 26;11:759. doi: 10.3389/fpsyg.2020.00759 (PMC7265091; doi:10.3389/fpsyg.2020.00759)
Supplement: FILE S1 — Raw data. [file Data_Sheet_1.xlsx]

## Sheet: Sheet1
team	tsize	Dynamic Team Environment1	Dynamic Team Environment2	Dynamic Team Environment3	Agreement Seeking Behavior1	Agreement Seeking Behavior2	Agreement Seeking Behavior3	Agreement Seeking Behavior4	Agreement Seeking Behavior5	Agreement Seeking Behavior6	Team Knowledge Integration1	Team Knowledge Integration12	Team Knowledge Integration3	Team Knowledge Integration4	Team Knowledge Integration5	Team Knowledge Integration6	Team Knowledge Integration7	Team Knowledge Integration8	Team Knowledge Integration9	Team Knowledge Integration10	Team Innovation1	Team Innovation2	Team Innovation3	Team Innovation4	Centralization of Decision Making1	Centralization of Decision Making2	Centralization of Decision Making3	Centralization of Decision Making4	Centralization of Decision Making5
1	6	4	5	4	4	5	6	6	7	6	3	7	4	6	6	6	6	5	5	7	3	7	4	5	3	4	5	4	4
1	6	5	5	7	7	7	5	4	5	4	4	6	5	5	3	4	4	5	4	3	6	5	6	5	5	5	5	3	3
1	6	6	4	5	7	7	7	7	7	7	5	4	7	6	6	6	4	5	6	3	6	4	4	5	3	5	5	3	3
2	6	7	4	6	6	7	7	7	6	4	5	4	4	5	4	5	3	5	3	5	5	5	4	4	4	4	4	3	3
2	6	5	5	4	5	5	7	5	5	7	6	6	4	5	6	4	6	5	5	6	5	5	5	5	4	5	4	5	4
2	6	4	5	5	6	7	6	5	7	6	7	6	5	4	3	5	6	5	7	6	5	4	7	6	4	4	4	4	4
3	6	4	3	5	4	7	5	7	7	5	4	6	3	4	5	5	5	7	4	5	6	6	4	5	4	4	5	5	5
3	6	4	7	6	6	7	6	7	7	6	5	3	6	4	6	6	7	5	4	4	6	5	5	4	4	6	2	6	3
3	6	6	6	4	4	7	6	6	4	7	7	5	4	4	6	4	5	5	6	6	4	5	5	5	5	3	3	2	3
4	6	5	6	5	3	5	5	5	5	6	3	2	2	3	2	4	3	4	4	2	7	7	7	7	1	2	2	2	2
4	6	5	5	4	6	6	5	5	6	5	2	4	3	3	4	3	4	3	2	3	7	7	7	7	2	2	3	1	3
4	6	5	5	5	6	5	4	5	5	3	4	3	1	3	5	1	4	3	2	4	7	7	7	7	1	3	2	0	4
5	6	3	5	4	4	4	5	6	5	6	2	5	2	5	2	3	2	3	4	4	7	7	7	7	2	2	2	1	4
5	6	5	6	6	4	5	5	3	5	5	4	4	2	4	4	2	2	3	2	3	7	7	7	7	1	4	2	1	1
5	6	5	5	6	5	5	6	6	6	5	4	4	2	2	2	3	2	3	3	3	7	7	7	7	3	1	1	4	1
6	6	4	6	4	7	3	7	4	6	4	4	3	3	1	4	2	2	3	3	3	7	7	7	7	1	1	4	1	2
6	6	5	6	6	4	3	4	6	6	3	4	2	2	3	3	3	2	3	3	2	7	7	7	7	2	3	1	3	2
6	6	6	4	4	6	4	5	6	6	6	4	5	3	3	4	4	2	5	1	4	7	7	7	7	3	2	3	1	1
7	6	3	2	2	4	3	4	3	4	4	2	4	2	2	5	1	3	4	3	4	1	1	2	2	1	1	1	1	1
7	6	2	2	4	5	5	4	4	4	5	5	1	3	2	2	2	3	4	5	4	4	2	2	3	1	1	1	1	1
7	6	3	5	4	5	2	6	4	4	2	3	5	2	2	3	3	4	2	3	2	1	2	1	3	1	1	1	1	1
8	6	3	3	4	3	3	4	5	4	5	2	5	5	2	2	3	3	3	3	1	2	1	2	2	1	1	1	1	1
8	6	2	2	3	3	4	4	2	4	4	4	2	5	3	2	2	3	3	3	3	2	2	1	4	1	1	1	1	1
8	6	2	4	4	4	4	5	5	5	4	3	2	4	2	4	2	3	3	4	4	1	4	2	1	1	1	1	1	1
9	6	3	3	2	6	2	6	3	5	3	5	2	5	2	3	5	1	2	2	2	2	3	1	2	1	1	1	1	1
9	6	3	4	2	3	2	3	5	5	2	3	4	4	2	4	2	5	1	2	3	4	1	1	1	1	1	1	1	1
9	6	4	3	3	5	3	4	5	5	5	2	4	4	2	3	2	4	4	3	3	4	1	2	2	1	1	1	1	1
10	6	7	5	7	7	7	7	7	7	7	4	5	7	6	5	4	7	6	5	7	6	5	7	6	7	5	7	6	5
10	6	7	5	5	7	7	7	7	7	7	5	7	7	6	7	7	5	5	6	7	5	6	7	6	7	7	6	5	7
10	6	7	5	6	7	7	7	7	7	7	7	7	6	7	5	4	7	7	5	7	5	7	5	7	5	7	4	5	7
11	6	7	6	7	7	7	7	7	7	7	6	7	6	5	7	6	4	7	5	7	6	6	6	6	7	5	5	6	7
11	6	4	6	7	7	7	7	7	7	7	7	5	6	5	6	5	6	7	4	7	5	5	6	7	7	7	6	4	5
11	6	5	6	6	7	7	7	7	7	7	6	6	4	7	7	6	7	7	7	5	6	7	5	7	6	7	6	5	7
11	6	5	6	7	7	7	7	7	7	7	5	5	7	7	5	7	6	6	6	6	5	5	7	7	6	7	7	5	5
12	6	5	7	6	7	7	7	7	7	7	7	6	7	5	7	5	7	6	7	5	6	7	7	4	6	7	6	5	7
12	6	7	6	6	7	7	7	7	7	7	7	5	5	7	5	6	5	6	4	7	4	6	6	7	6	4	7	5	7
12	6	5	5	7	7	7	7	7	7	7	7	7	6	7	6	6	6	7	4	5	6	5	7	7	7	5	6	6	6
13	10	7	7	7	7	7	7	7	7	7	7	7	4	5	4	7	7	5	7	5	7	7	7	7	1	1	1	1	1
13	10	7	7	7	7	7	7	7	7	7	5	7	4	7	7	7	6	7	6	6	7	7	7	7	1	1	1	1	1
13	10	7	7	7	7	7	7	7	7	7	7	6	6	7	5	5	7	7	6	4	7	7	7	7	1	1	1	1	1
14	10	7	7	7	7	7	7	7	7	7	7	7	6	6	7	4	5	7	7	5	7	7	7	7	1	1	1	1	1
14	10	7	7	7	7	7	7	7	7	7	5	7	4	6	6	7	7	5	7	7	7	7	7	7	1	1	1	1	1
14	10	7	7	7	7	7	7	7	7	7	7	4	6	6	7	6	5	6	4	7	7	7	7	7	1	1	1	1	1
15	10	7	7	7	7	7	7	7	7	7	6	5	6	5	6	6	6	5	5	7	7	7	7	7	1	1	1	1	1
15	10	7	7	7	7	7	7	7	7	7	7	7	7	6	6	6	7	6	5	7	7	7	7	7	1	1	1	1	1
15	10	7	7	7	7	7	7	7	7	7	5	7	7	7	7	5	7	4	4	6	7	7	7	7	1	1	1	1	1
16	10	7	7	7	7	7	7	7	7	7	5	5	7	6	7	5	6	7	6	5	7	7	7	7	1	1	1	1	1
16	10	7	7	7	7	7	7	7	7	7	6	7	5	7	6	7	4	7	7	5	7	7	7	7	1	1	1	1	1
16	10	7	7	7	7	7	7	7	7	7	5	5	7	7	5	7	7	6	5	6	7	7	7	7	1	1	1	1	1
17	10	7	7	7	7	7	7	7	7	7	5	4	7	6	6	6	7	5	6	5	7	7	7	7	1	1	1	1	1
17	10	7	7	7	7	7	7	7	7	7	7	5	7	7	7	7	7	7	4	7	7	7	7	7	1	1	1	1	1
17	10	7	7	7	7	7	7	7	7	7	7	4	7	6	7	6	4	5	5	7	7	7	7	7	1	1	1	1	1
18	6	6	6	6	4	5	7	5	4	4	6	6	6	7	4	7	7	7	6	4	6	7	5	6	3	2	2	2	2
18	6	6	7	5	5	4	4	4	5	7	6	7	7	7	7	6	6	5	6	6	7	5	5	7	1	3	2	2	2
18	6	5	7	6	7	5	6	5	3	6	4	6	5	7	5	7	7	6	5	5	5	6	7	6	2	1	2	2	2
19	6	6	6	5	5	4	5	5	5	4	5	7	6	7	6	6	5	6	5	7	5	6	6	6	1	3	2	2	1
19	6	6	6	7	4	6	6	4	6	4	6	7	5	7	4	7	5	5	7	7	5	7	7	6	2	3	3	1	3
19	6	5	7	6	5	7	5	5	5	5	7	7	6	6	6	5	5	8	5	5	6	6	6	6	1	1	3	3	1
20	6	7	5	6	4	5	5	4	4	5	5	6	5	7	6	7	6	7	5	7	7	5	7	5	2	3	1	2	3
20	6	7	6	5	7	5	4	6	5	6	6	4	6	6	6	6	7	7	4	7	7	5	7	5	3	3	1	2	1
20	6	5	7	6	6	5	4	6	5	4	7	6	7	7	7	7	5	5	4	5	6	5	7	6	2	1	2	3	1
21	10	7	7	7	5	6	5	5	5	3	2	3	1	3	4	2	1	4	4	4	4	4	5	2	3	7	4	6	6
21	10	7	7	7	6	7	5	4	4	5	3	4	4	4	4	4	2	3	3	5	4	5	5	5	4	6	5	6	5
21	10	7	7	7	4	4	6	7	5	4	2	1	4	2	1	2	2	4	5	3	3	3	3	5	4	6	5	5	3
21	10	7	7	7	5	5	5	5	4	6	3	3	3	3	3	3	2	2	4	4	4	4	3	5	4	4	6	6	5
22	10	7	7	7	5	7	5	5	4	5	1	4	4	4	4	2	5	2	3	4	5	4	3	4	4	4	5	4	5
22	10	7	7	7	5	6	5	5	5	6	1	2	1	4	1	2	3	4	2	2	4	2	5	5	5	4	7	6	6
22	10	7	7	7	3	5	5	4	5	5	4	5	2	4	3	4	4	2	3	4	2	5	4	5	6	4	5	6	4
23	10	7	7	7	5	6	6	3	4	4	2	4	5	1	4	3	2	1	5	3	3	4	4	2	5	4	4	5	4
23	10	7	7	7	6	6	5	5	5	5	4	2	2	4	2	3	4	3	3	3	4	4	4	4	5	5	5	4	7
23	10	7	7	7	5	7	5	5	4	4	3	3	1	5	2	4	2	5	2	3	5	5	5	4	6	6	4	5	6
24	10	7	7	7	6	7	4	4	4	4	4	3	3	2	2	4	4	2	2	3	6	2	6	3	4	6	5	5	4
24	10	7	7	7	4	7	5	6	4	4	2	4	3	2	2	5	3	4	2	2	5	3	4	4	7	6	5	4	3
24	10	7	7	7	7	6	6	4	4	4	4	2	3	3	3	4	2	3	5	3	3	5	5	2	5	6	5	4	6
25	10	7	7	7	4	3	6	4	6	6	2	2	2	2	4	3	3	4	3	2	4	3	4	5	4	6	3	4	5
25	10	7	7	7	5	5	4	5	7	7	4	2	4	4	4	2	4	3	2	3	5	4	3	4	5	5	7	4	5
25	10	7	7	7	4	6	4	4	4	6	3	4	4	4	3	2	2	3	3	3	6	4	3	3	5	3	6	7	6
26	6	1	3	2	2	2	2	3	2	4	7	5	6	6	7	7	6	7	6	6	5	6	7	5	7	7	7	4	7
26	6	2	2	2	3	4	4	3	2	4	5	6	5	6	6	6	6	7	6	7	5	6	5	7	6	6	4	7	7
26	6	2	3	1	2	3	4	3	4	3	5	5	5	7	7	4	4	6	7	7	6	7	6	7	5	7	6	5	5
27	6	2	1	2	2	3	4	3	1	3	7	6	5	5	6	4	5	5	6	5	5	6	7	7	7	6	7	5	7
27	6	2	1	2	5	1	4	3	2	4	7	5	5	7	7	5	6	7	6	7	5	5	7	7	5	7	6	7	5
27	6	2	3	3	2	5	2	5	2	3	7	7	7	6	6	7	6	6	5	7	7	5	4	7	6	5	5	7	5
28	6	1	3	1	3	4	4	4	4	4	6	7	7	7	6	5	7	5	6	5	7	5	7	4	6	5	6	7	7
28	6	4	2	1	2	3	3	2	4	4	7	6	4	5	7	7	5	7	5	7	5	7	4	7	5	7	6	7	6
28	6	2	3	1	1	3	3	2	2	2	6	7	7	4	7	6	5	6	6	5	7	7	6	6	6	6	7	4	5
29	8	4	5	5	2	3	1	3	3	5	3	4	6	4	6	5	5	5	4	5	6	6	7	5	4	3	3	2	2
29	8	5	7	6	4	3	3	4	4	2	6	4	7	4	5	4	5	5	3	5	6	6	7	5	4	3	4	4	2
29	8	4	6	3	2	3	3	3	4	2	7	6	5	5	5	5	5	7	5	5	7	7	5	5	2	4	1	3	4
30	8	4	5	5	2	3	2	3	2	2	5	5	5	6	6	4	4	5	6	6	6	7	5	6	3	4	3	2	3
30	8	5	7	5	3	2	4	5	3	3	6	5	4	4	6	5	4	6	5	5	7	5	5	7	4	3	1	3	5
30	8	5	5	4	4	4	2	5	1	4	6	4	5	5	4	5	3	4	5	7	7	5	5	7	1	4	3	2	4
31	8	6	6	5	2	4	2	2	4	3	6	7	4	4	5	4	4	5	6	6	6	6	5	6	2	2	2	2	2
31	8	5	6	5	3	4	3	4	5	2	5	5	6	6	5	5	4	5	4	4	7	6	6	6	3	2	4	4	4
31	8	4	4	4	3	2	2	2	3	4	6	6	6	4	6	4	4	6	4	4	6	6	5	7	4	4	2	4	4
31	8	5	5	5	3	3	3	3	4	5	5	5	5	5	4	4	6	6	5	5	5	5	7	7	3	4	2	2	4
32	8	5	4	4	4	4	3	3	2	2	4	6	4	6	6	5	3	4	6	4	6	6	5	7	2	4	4	3	3
32	8	6	4	5	3	3	4	2	3	2	7	4	6	6	6	4	3	6	4	5	6	6	6	6	4	4	2	2	2
32	8	5	6	6	2	5	5	2	2	3	6	6	7	5	5	4	4	5	5	4	6	5	7	6	3	3	3	3	3
33	6	2	2	4	3	4	6	4	3	3	2	3	3	5	2	2	3	3	4	4	3	1	3	2	4	3	3	3	4
33	6	2	5	2	4	3	3	3	3	6	4	1	2	3	4	1	4	4	2	5	3	1	1	1	3	2	3	3	3
33	6	5	2	3	6	4	5	4	3	5	3	3	3	2	2	4	4	2	3	3	2	3	2	2	4	3	2	3	2
34	6	4	2	3	4	3	4	4	4	3	1	2	1	3	4	2	4	5	2	4	2	3	1	3	3	2	2	3	2
34	6	4	2	2	4	5	5	4	5	4	2	4	4	4	2	4	2	2	4	3	2	2	2	2	4	3	3	3	4
34	6	2	4	4	4	5	3	4	4	3	3	3	4	3	4	3	2	3	3	3	1	2	2	2	4	2	5	1	4
35	6	2	4	4	3	5	4	3	3	3	5	3	4	4	3	2	3	5	2	2	1	3	2	1	2	4	2	2	5
35	6	2	3	3	6	4	4	5	4	5	1	3	4	2	3	5	5	3	1	3	1	2	3	3	3	3	4	3	4
35	6	4	2	3	5	4	3	5	4	2	5	3	1	2	3	2	3	3	2	3	2	3	1	2	5	1	3	2	2
36	8	4	5	4	4	6	5	5	5	4	6	4	5	4	4	5	6	6	6	6	6	5	5	7	7	7	7	7	7
36	8	3	4	4	6	5	4	6	4	6	4	4	4	4	3	7	6	5	6	6	6	7	7	5	7	7	7	7	7
36	8	4	4	4	5	5	4	7	5	4	7	4	3	5	4	5	7	7	4	3	6	6	6	6	7	7	7	7	7
37	8	4	4	4	6	5	6	7	5	4	4	6	4	4	4	5	3	5	5	5	5	6	6	7	7	7	7	7	7
37	8	4	5	4	6	5	3	4	6	4	7	6	5	6	5	5	4	4	6	4	6	7	7	5	7	7	7	7	7
37	8	3	4	4	5	3	6	6	4	5	4	5	5	7	7	6	5	4	6	4	6	5	5	7	7	7	7	7	7
38	8	3	3	4	6	6	7	6	3	5	5	3	4	7	4	5	5	5	7	3	5	5	7	6	7	7	7	7	7
38	8	5	4	5	4	4	6	5	5	5	7	7	5	4	4	4	6	4	4	7	7	5	6	6	7	7	7	7	7
38	8	4	4	4	4	4	4	7	4	5	5	6	6	3	6	6	4	6	4	4	7	5	6	7	7	7	7	7	7
39	8	2	4	4	5	4	5	4	4	6	5	4	6	6	7	5	6	4	6	4	6	6	5	6	7	7	7	7	7
39	8	4	4	5	4	5	5	5	6	6	6	6	4	4	5	6	4	6	4	5	6	6	6	7	7	7	7	7	7
39	8	5	4	4	5	6	6	4	5	5	4	7	6	3	6	4	5	4	3	5	5	7	6	6	7	7	7	7	7
40	6	2	3	3	7	5	7	5	5	5	6	5	7	6	7	7	5	5	6	6	7	7	7	7	2	1	1	1	2
40	6	3	3	3	7	6	7	5	7	5	5	7	7	7	5	7	5	7	7	6	7	7	7	7	3	2	3	2	2
40	6	4	3	3	7	6	7	5	7	5	5	4	4	6	6	4	7	7	7	7	7	7	7	7	2	2	2	2	3
41	6	3	4	2	5	7	5	6	5	6	7	7	6	7	7	7	6	4	4	7	7	7	7	7	3	2	2	1	3
41	6	2	3	3	4	7	7	7	6	7	6	4	5	5	5	7	7	5	7	6	7	7	7	7	1	1	1	2	1
41	6	3	4	3	6	6	6	7	6	5	5	7	6	4	6	7	7	7	6	6	7	7	7	7	3	3	1	3	3
41	6	3	3	3	6	6	6	6	6	6	6	6	6	6	6	6	6	6	6	6	7	7	7	7	2	2	2	2	2
42	6	3	3	3	7	7	4	5	4	7	7	7	6	5	7	5	6	7	7	6	7	7	7	7	2	3	1	1	4
42	6	3	3	2	7	5	7	7	5	6	5	7	6	5	7	7	6	7	5	5	7	7	7	7	2	3	4	1	2
42	6	3	3	4	4	7	7	7	6	6	6	7	5	6	5	7	5	5	6	5	7	7	7	7	1	1	1	1	3
43	6	7	5	6	7	7	7	7	7	7	4	6	6	4	7	6	4	7	7	4	5	6	7	6	2	3	4	5	4
43	6	6	6	4	7	7	7	7	7	7	6	5	6	7	7	5	7	6	7	6	5	6	6	7	1	5	2	2	3
43	6	7	4	8	7	7	7	7	7	7	6	7	6	6	7	6	4	7	7	7	6	6	6	6	3	4	2	3	2
44	6	5	6	5	7	7	7	7	7	7	5	6	5	6	7	5	7	6	7	5	6	5	6	5	2	5	5	2	2
44	6	7	5	6	7	7	7	7	7	7	7	7	6	7	7	5	7	4	6	7	6	5	5	6	3	3	3	3	1
44	6	7	7	6	7	7	7	7	7	7	7	6	4	7	5	7	5	7	6	4	7	7	7	7	4	2	5	3	2
45	6	6	6	7	7	7	7	7	7	7	5	7	7	5	5	6	6	6	5	6	6	6	6	6	2	3	3	3	3
45	6	5	4	6	7	7	7	7	7	7	5	5	7	5	7	7	7	7	7	6	7	6	7	6	3	2	4	2	4
45	6	7	7	6	7	7	7	7	7	7	7	7	5	5	7	6	6	6	5	5	5	5	5	7	3	3	3	4	3
46	8	3	4	6	6	4	4	4	6	6	5	6	5	6	6	6	6	4	4	4	4	4	3	3	5	5	2	5	3
46	8	4	6	5	3	4	6	6	6	5	5	5	5	5	4	6	5	6	5	3	2	6	6	4	4	5	5	5	3
46	8	5	7	5	4	6	4	5	6	5	4	4	6	6	5	4	5	6	3	6	5	4	2	5	4	4	4	3	3
47	8	6	6	4	6	6	5	5	6	6	7	5	5	5	7	5	5	4	5	5	4	3	4	4	4	3	3	3	3
47	8	7	6	5	4	4	4	5	6	4	4	6	4	6	6	5	4	5	4	4	4	4	3	5	6	6	4	5	4
47	8	4	4	3	6	4	6	5	4	4	4	6	6	6	4	3	6	6	5	3	5	3	5	4	3	5	4	3	4
48	8	3	6	4	6	5	3	6	6	4	7	3	6	3	6	5	7	3	5	4	4	5	4	4	4	4	3	5	5
48	8	6	6	6	6	7	4	4	4	4	6	3	6	4	5	5	6	6	4	6	4	4	3	5	5	3	5	3	3
48	8	5	5	4	5	6	6	4	6	4	6	3	4	5	5	5	6	4	7	5	4	4	4	3	5	3	4	4	4
49	8	6	6	6	5	6	7	4	4	6	6	4	4	5	6	5	5	5	6	4	4	4	3	5	3	4	4	3	3
49	8	5	5	5	5	4	5	5	4	3	5	5	5	5	6	4	6	6	4	6	4	4	5	4	3	6	4	4	5
49	8	4	4	4	6	7	3	5	5	6	4	5	5	4	4	5	6	4	6	5	4	5	4	2	4	5	5	4	3
50	6	7	7	7	7	3	5	6	6	5	6	7	5	7	4	4	6	6	7	7	5	5	5	6	5	2	5	2	3
50	6	7	7	7	5	5	6	4	4	5	6	7	6	6	7	6	7	4	6	5	6	6	7	6	5	2	2	2	2
50	6	7	7	7	5	5	3	7	4	5	4	6	6	7	7	7	6	6	7	5	6	7	6	7	2	3	4	2	4
51	6	7	7	7	3	7	5	3	4	5	7	7	7	6	7	4	7	4	6	5	7	7	7	5	2	5	3	3	3
51	6	7	7	7	4	4	7	4	7	4	5	5	6	6	7	4	7	5	7	7	5	5	6	6	3	4	4	2	3
51	6	7	7	7	5	6	5	5	7	5	6	6	5	6	6	4	7	7	7	7	6	6	5	7	2	2	4	3	2
51	6	7	7	7	4	4	6	6	5	5	5	5	7	7	6	6	6	6	6	6	6	6	5	7	2	2	4	4
52	6	7	7	7	7	6	7	6	6	4	5	4	5	7	7	7	6	5	7	4	5	6	7	6	2	3	2	3	2
52	6	7	7	7	3	4	3	4	5	4	8	6	6	5	7	6	7	5	7	6	5	5	6	7	2	1	4	3	4
52	6	7	7	7	5	4	6	5	4	7	7	5	5	6	6	7	5	5	7	7	5	7	7	6	3	4	4	4	4
53	8	4	3	3	4	5	5	4	5	2	5	4	4	5	5	4	5	5	7	6	4	3	2	2	5	5	5	4	4
53	8	2	2	2	5	4	4	3	3	4	4	5	6	4	5	5	4	7	6	5	2	4	3	4	7	5	4	4	6
53	8	5	3	3	3	3	5	6	4	3	4	4	4	4	3	7	7	7	4	5	4	2	2	4	4	5	5	6	6
54	8	2	4	2	4	6	4	4	3	4	6	7	7	5	6	6	4	3	4	6	2	3	4	3	3	4	6	4	6
54	8	2	4	3	4	5	4	4	4	5	4	4	4	5	4	6	5	4	6	5	4	3	2	3	5	5	5	4	6
54	8	3	4	3	2	4	4	3	4	4	7	4	5	6	3	6	5	4	4	5	4	3	2	3	6	4	6	6	5
55	8	4	4	3	4	5	5	2	3	3	4	5	4	4	6	7	5	4	5	4	3	1	4	3	4	5	5	3	6
55	8	3	2	2	5	5	4	4	4	4	5	3	3	4	5	6	6	4	6	5	2	4	2	5	4	5	6	6	4
55	8	2	3	4	4	6	4	4	3	3	7	7	7	6	7	3	4	5	6	3	2	5	2	3	5	4	6	6	6
56	8	4	4	2	5	6	3	4	4	4	6	4	5	5	5	7	4	4	3	5	2	3	3	4	5	5	5	6	6
56	8	3	2	2	3	3	4	5	3	2	6	4	5	4	6	6	7	5	6	3	4	3	2	2	4	4	5	6	6
56	8	3	3	4	5	5	5	6	2	3	5	6	6	4	4	4	4	6	6	5	4	2	3	4	6	5	4	4	4
57	10	7	6	7	3	3	3	4	4	2	4	3	2	4	4	4	3	2	2	3	7	7	7	7	4	4	2	4	5
57	10	5	6	5	5	3	2	2	3	3	2	3	3	4	2	3	3	4	2	2	7	7	7	7	5	4	5	3	5
57	10	7	6	5	3	3	3	2	4	2	3	1	5	4	2	2	5	4	3	2	7	7	7	7	4	4	4	3	4
58	10	7	6	5	4	5	3	4	4	4	4	3	3	2	1	5	3	4	3	2	7	7	7	7	3	3	5	5	4
58	10	4	6	7	3	2	3	3	3	2	3	4	5	3	3	3	2	4	2	2	7	7	7	7	3	4	5	4	4
58	10	7	5	7	2	2	2	2	2	4	2	4	2	3	2	5	4	3	2	2	7	7	7	7	3	4	4	5	4
59	10	5	4	7	4	2	4	2	4	3	3	2	5	4	5	1	3	3	2	2	7	7	7	7	4	4	5	3	4
59	10	4	7	7	2	3	3	4	4	2	3	2	4	5	2	4	2	4	3	2	7	7	7	7	4	3	4	4	4
59	10	7	7	6	3	2	3	4	3	2	3	2	4	5	1	4	4	2	1	3	7	7	7	7	5	5	2	3	6
60	10	5	6	7	2	3	2	3	4	2	3	3	3	5	2	3	2	5	3	2	7	7	7	7	4	4	4	4	4
60	10	7	4	6	1	2	3	4	3	4	4	4	2	2	3	1	3	4	3	2	7	7	7	7	4	4	6	4	4
60	10	7	5	7	4	4	4	4	2	3	1	2	4	4	3	3	2	3	4	5	7	7	7	7	3	3	5	4	3
61	10	6	5	7	3	5	2	2	4	2	3	5	3	2	1	1	1	2	2	4	7	7	7	7	4	4	4	3	6
61	10	6	7	5	2	2	2	3	3	3	5	3	3	4	4	2	5	2	5	4	7	7	7	7	4	5	3	2	5
61	10	5	6	7	3	4	4	4	4	2	4	2	2	3	2	2	5	3	1	5	7	7	7	7	5	5	5	2	3
62	6	5	5	6	6	6	7	6	6	6	3	3	5	5	4	5	5	5	3	4	7	6	5	7	7	7	4	7	5
62	6	6	6	5	5	5	7	7	6	4	3	4	5	3	3	4	4	4	5	3	6	7	5	6	7	7	5	7	4
62	6	4	5	3	7	7	6	6	7	4	4	4	4	5	3	4	4	4	4	4	6	7	5	5	5	7	4	7	7
62	6	4	6	5	5	5	5	7	7	7	4	4	4	4	5	5	3	3	4	4	5	7	6	6	5	7	6	6	6
63	6	5	5	5	5	7	7	5	5	7	6	3	5	2	4	5	5	5	3	3	7	7	7	7	7	6	7	6	6
63	6	5	5	6	4	6	6	7	7	5	5	3	5	5	3	4	5	4	3	3	6	6	6	4	5	6	6	7	5
63	6	4	5	5	4	7	7	6	6	7	3	3	4	5	3	4	4	5	4	4	5	7	5	5	5	6	7	6	5
64	6	3	5	3	7	6	5	6	6	7	5	4	5	2	4	5	5	5	3	3	6	5	6	7	7	7	6	6	7
64	6	4	5	7	6	5	6	5	6	6	3	5	5	4	3	4	4	5	3	3	6	7	6	7	5	5	7	7	5
64	6	6	6	6	6	5	5	7	7	7	4	3	4	5	3	4	4	5	4	4	5	7	6	4	5	7	4	6	6
65	8	6	5	6	3	4	5	3	5	5	3	5	5	2	4	5	5	5	3	3	3	3	4	4	4	2	3	3	5
65	8	3	5	5	4	4	3	4	5	4	4	5	5	2	3	4	4	4	4	4	2	2	2	3	2	3	4	2	2
65	8	5	5	5	3	5	3	4	3	5	4	4	4	5	4	4	4	4	4	4	2	3	3	5	1	2	4	5	3
66	8	6	6	7	3	5	4	4	5	3	4	4	5	2	4	5	5	5	3	3	4	3	3	3	1	4	4	4	4
66	8	3	4	4	5	3	3	5	3	5	4	4	5	5	3	4	4	5	3	3	4	2	3	1	2	5	2	5	4
66	8	4	4	7	4	4	4	6	3	3	3	6	4	5	3	4	4	3	4	4	3	3	4	3	2	2	1	4	1
67	8	6	6	3	5	4	5	6	4	3	4	4	5	2	4	5	5	5	3	3	2	3	2	3	2	3	4	2	2
67	8	6	5	5	5	4	3	3	4	3	3	6	5	5	4	4	4	3	3	3	3	3	3	2	4	3	2	4	1
67	8	6	4	4	4	3	4	5	3	4	4	5	4	5	3	4	4	3	4	4	4	5	3	3	4	4	2	4	4
68	8	4	6	4	5	5	6	5	4	4	3	4	5	3	4	5	5	5	4	3	4	4	2	5	2	4	5	1	4
68	8	6	6	5	3	3	3	4	4	4	3	5	5	5	3	4	4	4	3	3	1	4	2	4	3	2	2	5	3
68	8	4	4	6	3	3	3	6	3	4	4	5	4	5	3	4	4	3	4	4	2	2	5	1	4	2	2	4	2
69	6	4	7	4	4	4	5	4	5	6	7	7	7	7	7	7	7	7	7	7	7	5	6	7	7	6	5	7	7
69	6	6	6	6	4	4	5	6	6	5	7	7	7	7	7	7	7	7	7	7	7	6	4	6	7	5	6	6	7
69	6	4	3	5	4	6	6	4	6	6	7	7	7	7	7	7	7	7	7	7	6	6	6	6	6	5	6	5	5
70	6	4	5	6	5	4	4	7	6	3	7	7	7	7	7	7	7	7	7	7	7	7	5	5	6	5	6	5	6
70	6	6	7	4	4	5	4	4	6	5	7	7	7	7	7	7	7	7	7	7	5	5	7	5	6	6	5	5	7
70	6	5	4	4	5	6	7	5	5	5	7	7	7	7	7	7	7	7	7	7	6	6	7	7	7	7	7	6	6
71	6	5	4	4	7	4	5	4	4	6	7	7	7	7	7	7	7	7	7	7	7	6	6	6	6	7	6	5	7
71	6	6	4	5	6	6	4	4	4	7	7	7	7	7	7	7	7	7	7	7	5	6	7	5	5	7	7	7	7
71	6	5	5	7	4	4	6	5	5	5	7	7	7	7	7	7	7	7	7	7	6	6	6	6	5	5	6	4	6
72	6	6	3	6	4	5	4	4	3	5	4	4	6	6	6	6	6	4	4	6	4	5	4	4	3	4	5	3	5
72	6	3	5	3	5	3	4	4	5	3	4	5	4	6	5	4	4	5	7	5	4	2	5	5	5	4	4	3	4
72	6	4	3	3	4	5	4	3	3	4	5	5	6	3	5	6	4	4	5	6	6	2	3	4	5	4	3	5	3
72	6	4	4	4	4	5	5	3	3	4	4	4	6	6	5	5	5	5	5	5	4	4	4	4	4	4	4	4	4
73	6	5	4	2	5	3	5	3	5	3	6	4	4	4	7	7	4	7	5	4	3	3	5	5	4	3	5	3	5
73	6	5	3	4	3	3	5	3	5	4	5	4	5	4	3	5	3	5	6	7	4	3	4	6	4	4	5	3	5
73	6	5	5	3	4	5	3	4	3	6	3	7	6	3	7	4	4	4	6	7	4	4	3	4	3	3	5	3	5
74	6	4	4	6	5	5	3	4	5	5	4	6	7	4	3	6	4	6	4	4	4	5	4	4	4	4	3	6	2
74	6	4	4	3	3	3	3	4	5	4	5	4	3	5	5	6	6	6	6	5	4	5	3	4	3	5	4	5	6
74	6	4	3	4	5	3	5	4	3	3	4	4	6	4	6	3	7	5	6	6	4	3	4	4	4	3	5	4	2
75	6	6	6	6	5	4	2	5	5	3	5	6	5	2	4	5	5	5	3	3	6	7	5	7	1	3	1	1	2
75	6	5	4	4	5	5	3	3	4	4	4	3	5	3	3	4	4	5	3	3	6	7	6	4	2	1	3	3	3
75	6	4	5	5	4	6	4	3	4	3	4	4	4	5	3	4	4	4	4	4	4	6	7	7	3	1	2	1	3
76	6	6	6	5	4	5	4	4	3	5	3	6	5	2	4	5	5	5	3	3	7	6	6	5	1	1	1	3	2
76	6	6	6	6	4	3	4	4	3	4	5	6	5	4	3	4	4	3	3	3	6	7	5	5	2	2	3	3	1
76	6	4	3	3	5	4	3	4	4	5	4	5	4	5	3	4	4	2	4	4	7	5	6	7	3	2	3	2	1
77	6	5	5	7	6	3	3	5	5	4	5	3	5	2	4	5	5	5	3	3	5	7	6	5	3	2	2	1	1
77	6	7	4	4	4	4	3	3	4	4	5	5	5	5	3	4	4	5	3	3	6	7	6	6	3	2	3	1	1
77	6	4	5	4	4	4	3	6	3	4	2	3	4	5	4	4	5	3	4	4	7	4	7	6	2	2	3	1	3
78	8	4	5	5	3	4	6	5	4	5	3	5	5	2	4	5	5	5	3	3	4	5	4	5	3	5	2	4	2
78	8	3	5	5	7	4	4	5	6	6	4	6	5	4	3	4	4	5	3	3	6	6	4	5	5	5	3	4	5
78	8	5	7	6	4	5	6	3	6	7	3	5	4	5	3	4	4	3	4	4	6	4	6	5	5	6	5	2	4
79	8	5	6	6	5	4	4	5	4	4	2	4	5	4	4	5	5	5	3	3	5	6	6	5	3	3	4	4	4
79	8	5	7	3	6	7	4	5	6	5	4	3	5	4	3	4	4	5	5	3	5	4	3	5	4	4	3	3	6
79	8	6	4	3	6	4	5	5	6	5	3	4	4	5	5	4	4	3	4	4	5	5	6	5	5	4	4	5	4
80	8	5	5	6	6	4	6	4	4	6	6	3	5	2	4	5	5	5	3	3	5	6	5	4	4	3	5	5	3
80	8	6	6	5	7	4	4	4	5	5	6	5	5	4	3	4	4	3	3	3	5	5	5	7	4	4	5	4	4
80	8	4	4	4	5	6	6	6	5	3	4	3	4	5	5	4	4	3	3	4	5	5	5	3	5	4	3	4	3
81	8	5	4	4	5	6	4	3	3	5	4	3	5	3	5	5	5	5	3	3	6	5	6	5	5	5	3	3	5
81	8	6	4	5	4	5	7	5	5	6	4	5	5	4	3	4	4	5	3	3	6	5	4	4	3	3	3	5	3
81	8	5	5	7	7	5	3	4	6	7	5	3	4	5	3	4	4	3	4	4	6	5	4	4	5	4	5	5	3
82	6	3	3	6	3	6	4	3	3	4	7	7	7	7	7	7	7	7	7	7	6	7	6	5	5	4	6	5	5
82	6	5	4	6	3	2	6	3	6	3	7	7	7	7	7	7	7	7	7	7	5	6	6	7	6	4	5	5	3
82	6	4	2	3	4	5	4	4	5	4	7	7	7	7	7	7	7	7	7	7	6	7	6	5	5	6	4	5	7
82	6	3	5	4	3	5	3	5	4	4	7	7	7	7	7	7	7	7	7	7	5	7	5	7	5	5	5	5	5
83	6	4	3	4	6	5	6	3	5	3	7	7	7	7	7	7	7	7	7	7	6	6	6	7	6	7	7	6	5
83	6	4	4	3	3	3	3	3	4	3	7	7	7	7	7	7	7	7	7	7	7	5	6	5	7	5	5	7	6
83	6	4	5	5	4	3	5	4	3	6	7	7	7	7	7	7	7	7	7	7	6	6	5	7	5	5	6	6	7
84	6	4	5	4	3	4	4	3	4	5	7	7	7	7	7	7	7	7	7	7	5	7	6	7	3	4	3	4	4
84	6	4	4	3	3	3	4	4	5	4	7	7	7	7	7	7	7	7	7	7	7	4	6	6	7	6	7	3	7
84	6	4	4	4	3	5	5	3	5	5	7	7	7	7	7	7	7	7	7	7	5	7	6	6	5	5	7	5	5
85	6	4	3	5	4	2	4	4	3	2	2	4	2	4	3	3	5	4	2	4	4	5	5	2	4	6	4	6	6
85	6	4	3	3	2	3	3	2	3	4	1	1	3	4	3	3	4	5	2	2	3	3	5	5	5	3	4	6	4
85	6	6	4	4	2	2	4	4	2	4	2	2	5	4	5	2	1	2	4	2	4	4	4	4	5	4	6	6	6
86	6	5	4	5	2	4	4	2	4	4	2	4	4	4	2	4	4	4	1	2	4	5	4	4	4	6	6	4	5
86	6	4	4	3	2	3	3	3	3	3	1	3	3	5	5	2	2	3	3	3	3	3	5	5	6	6	7	4	5
86	6	4	4	3	2	3	3	3	4	2	1	1	5	3	1	4	5	4	3	2	3	4	4	4	4	4	5	5	4
87	6	4	5	3	2	4	2	3	4	3	5	2	2	2	4	3	2	3	4	4	3	5	4	5	6	4	5	4	4
87	6	4	4	2	3	3	3	3	2	4	4	2	2	5	4	2	3	2	3	1	3	3	4	5	5	6	6	6	6
87	6	5	5	4	2	4	2	4	3	3	3	1	3	3	4	5	5	3	2	2	5	5	3	3	5	4	5	4	5
88	10	6	5	4	7	6	6	6	7	6	4	5	5	5	5	4	4	6	6	7	6	4	5	5	3	4	3	3	3
88	10	5	5	4	5	7	5	7	7	7	5	7	7	4	5	4	3	3	6	5	6	6	3	4	3	3	1	5	2
88	10	5	6	5	7	5	4	4	6	6	6	4	3	4	4	7	6	7	5	4	6	4	6	5	4	2	5	1	3
89	10	4	7	5	5	5	7	6	7	5	4	4	6	5	6	6	6	4	4	4	5	5	4	5	4	3	3	2	2
89	10	6	4	3	6	7	6	5	5	7	5	6	4	6	5	4	6	5	4	5	6	4	6	6	4	4	2	4	3
89	10	6	6	4	5	7	6	7	5	7	5	4	6	5	4	6	6	5	6	4	5	4	5	5	2	4	3	2	3
90	10	6	4	4	7	5	5	6	6	6	5	5	5	5	4	6	6	6	6	3	3	6	5	5	5	3	4	1	1
90	10	5	4	6	5	7	7	6	5	6	4	5	6	5	4	4	6	5	5	5	6	5	5	5	4	2	3	3	3
90	10	6	7	3	5	7	7	6	6	6	4	5	6	6	5	3	5	4	6	6	5	5	5	5	4	2	3	4	3
91	10	6	4	6	7	5	6	5	7	5	6	5	4	5	5	5	4	3	7	6	5	5	5	6	1	2	2	2	2
91	10	5	6	4	7	7	7	7	7	7	6	6	7	6	5	4	4	4	4	4	6	4	4	5	5	4	4	3	2
91	10	4	4	6	4	7	4	4	7	5	5	4	6	4	7	6	4	5	4	5	5	5	5	5	4	2	4	4	4
92	10	4	5	6	7	6	4	5	6	7	6	6	3	4	6	5	5	4	4	5	6	4	6	6	2	4	4	3	3
92	10	4	5	4	6	6	6	7	4	7	3	5	6	3	7	4	6	6	5	6	4	5	5	5	3	3	4	2	3
92	10	7	6	4	7	7	6	4	6	7	6	3	4	4	5	7	7	4	5	6	6	4	5	4	3	2	2	2	5
92	10	5	5	5	5	7	6	5	7	6	5	5	5	5	4	4	6	6	5	5	4	6	4	6	2	3	4	3	3
93	6	6	7	6	6	4	5	5	6	7	7	7	6	4	4	4	4	4	6	7	7	5	7	5	2	3	3	5	2
93	6	6	6	6	5	4	5	3	5	4	4	4	5	6	4	7	5	5	7	5	6	7	5	7	2	3	3	4	4
93	6	5	5	7	4	5	6	7	4	5	4	3	6	4	4	5	4	6	4	5	6	6	5	6	4	1	2	3	4
94	6	6	7	7	4	4	6	4	4	5	6	4	5	4	4	5	6	5	4	5	7	6	5	7	2	4	4	2	5
94	6	7	6	6	6	4	6	5	6	4	7	4	7	6	3	4	5	4	7	5	5	7	7	6	2	3	4	2	2
94	6	4	6	5	5	5	6	5	7	4	5	6	5	4	5	4	5	4	6	6	5	6	5	6	4	4	2	2	3
95	6	6	6	4	6	5	5	5	5	5	4	6	3	5	6	6	5	6	5	4	5	4	6	7	1	2	1	3	4
95	6	6	7	7	4	3	3	6	7	6	4	6	4	6	6	5	5	4	6	4	7	7	5	7	2	4	4	2	4
95	6	5	7	6	5	6	7	4	4	4	4	3	7	6	5	6	4	3	6	6	5	7	6	6	3	4	4	4	3
96	6	6	5	5	6	5	5	6	5	6	5	6	5	7	6	4	4	4	3	4	3	2	1	2	4	5	6	5	2
96	6	4	4	5	6	4	4	6	4	4	6	7	6	4	4	4	5	5	4	4	3	1	2	3	4	4	5	5	3
96	6	5	6	5	3	5	5	5	4	7	7	7	4	6	4	4	5	6	5	5	2	2	1	2	3	3	4	4	3
97	6	5	5	4	6	5	5	5	5	5	6	4	5	7	4	6	6	4	3	6	1	2	1	2	5	3	4	4	3
97	6	5	4	4	3	3	4	5	7	7	6	6	6	4	6	3	5	5	3	5	3	2	2	1	3	5	4	2	5
97	6	5	6	7	3	4	7	6	6	4	5	5	5	5	6	3	4	6	6	5	3	1	2	4	5	3	5	6	3
98	6	5	5	4	5	4	5	6	5	5	6	5	5	6	6	5	3	3	6	5	3	2	2	2	5	4	5	4	6
98	6	6	5	4	3	6	4	5	6	6	7	4	6	6	7	3	4	4	5	3	2	2	1	1	5	3	5	3	4
98	6	5	5	6	3	5	5	7	5	5	6	4	5	5	5	3	6	6	5	6	2	3	2	2	5	3	2	2	4
99	10	3	4	4	4	3	3	6	5	3	1	2	3	2	3	2	2	3	1	2	1	3	1	2	2	4	2	4	2
99	10	3	3	5	3	4	3	4	5	4	1	3	2	1	3	2	2	3	1	4	2	1	2	3	3	3	3	3	4
99	10	6	4	4	4	5	4	4	5	3	1	3	2	1	2	3	1	1	2	1	3	1	2	3	3	2	3	4	3
100	10	4	5	4	6	3	4	3	3	5	1	1	4	1	2	2	3	1	3	2	4	3	1	1	5	3	4	4	3
100	10	4	3	4	5	5	3	4	5	4	3	1	2	1	1	3	2	2	2	4	2	2	3	2	2	3	4	2	2
100	10	4	5	3	3	3	5	4	3	4	1	3	2	2	2	2	1	2	2	2	1	3	1	1	1	3	4	2	3
101	10	4	4	5	2	3	5	4	3	4	1	3	2	1	1	2	3	3	2	3	1	1	3	1	5	5	3	2	3
101	10	4	4	4	3	4	5	4	5	5	1	2	3	2	2	2	1	2	2	2	3	3	1	2	5	3	2	2	2
101	10	3	4	4	3	4	5	2	5	6	3	3	2	2	1	2	1	2	3	1	2	1	3	3	2	3	3	2	3
102	10	4	5	5	4	3	3	4	3	3	2	1	1	1	2	1	3	3	2	2	1	1	1	2	4	3	2	4	4
102	10	3	3	4	5	6	3	4	5	4	2	2	1	1	4	3	2	1	2	3	2	3	3	3	4	3	2	2	3
102	10	4	4	4	5	3	4	4	5	4	1	2	2	2	2	3	2	1	3	3	1	3	2	2	2	3	3	4	2
102	10	4	4	4	4	4	4	4	4	4	2	2	2	2	2	2	2	1	3	2	2	2	2	2	2	3	4	3	3
103	10	4	4	4	5	3	5	3	3	4	4	3	1	1	4	2	3	4	1	3	2	3	2	1	3	3	4	2	4
103	10	4	6	4	6	4	3	3	3	4	1	1	1	1	3	1	3	1	1	2	2	2	3	2	3	1	3	4	2
103	10	4	3	3	4	5	5	5	4	3	2	1	3	3	1	2	1	2	1	3	1	2	2	2	2	5	4	3	2
104	10	3	3	2	4	3	3	2	2	4	5	6	6	5	4	4	7	6	4	4	3	4	3	4	4	3	4	4	3
104	10	2	5	4	4	2	2	3	2	4	4	4	5	4	6	5	6	4	4	6	5	1	3	2	3	5	6	3	4
104	10	3	2	3	3	2	2	5	3	4	4	6	6	5	6	5	6	5	4	4	2	2	3	4	4	5	6	2	4
105	10	3	3	3	2	3	4	2	3	3	5	7	6	5	4	4	4	6	4	6	5	4	1	5	5	5	4	4	3
105	10	2	4	2	3	4	2	3	5	3	6	5	6	6	4	6	6	4	4	6	2	2	3	3	3	3	3	4	4
105	10	5	3	2	2	2	2	2	4	5	5	3	4	4	4	6	5	5	4	6	4	2	3	2	4	4	6	4	4
106	10	3	3	3	3	4	3	2	4	2	4	4	4	6	4	6	4	7	4	6	2	5	5	2	3	6	4	3	3
106	10	3	3	3	2	4	2	2	4	4	4	5	5	7	5	4	6	4	4	5	2	3	3	3	4	3	3	6	3
106	10	3	4	2	2	3	3	3	3	4	7	5	5	5	7	4	5	4	4	6	3	2	4	2	6	3	4	5	4
107	10	4	5	3	3	3	2	3	4	2	3	6	4	5	6	4	4	6	5	6	5	3	2	2	4	6	4	6	5
107	10	2	3	2	2	3	3	5	2	2	4	3	5	5	6	6	5	7	6	6	3	3	3	3	6	5	5	3	2
107	10	3	2	3	3	3	4	4	4	2	4	5	6	6	4	4	6	4	4	5	3	2	4	3	3	2	2	4	3
108	10	3	3	5	2	3	4	3	4	4	6	4	4	4	4	5	7	7	5	6	4	3	3	4	4	3	5	4	3
108	10	2	2	2	2	5	2	3	4	2	4	6	4	5	5	4	5	4	3	7	4	3	3	2	6	3	4	4	4
108	10	2	4	4	2	4	3	2	2	3	7	3	5	7	6	5	5	5	4	4	3	1	3	3	4	5	3	4	4
109	8	7	5	6	7	7	7	6	5	5	4	7	4	7	4	7	7	4	4	4	3	3	5	3	5	5	7	6	7
109	8	6	7	5	7	6	4	6	5	8	4	6	5	5	4	4	6	5	5	6	5	5	4	4	5	6	7	6	5
109	8	7	7	6	5	7	7	6	5	5	6	3	5	5	3	7	4	6	5	4	3	4	5	4	6	7	5	7	6
110	8	6	6	6	5	7	6	7	7	5	4	5	6	5	6	6	5	5	5	4	3	5	3	4	7	7	7	7	5
110	8	6	6	6	7	6	5	7	6	7	4	4	7	5	4	4	4	5	6	5	4	5	3	5	5	5	4	7	5
110	8	6	6	6	5	7	4	7	5	5	6	5	6	6	5	5	6	4	4	4	4	4	5	3	7	7	6	5	6
111	8	6	6	7	7	7	7	7	6	5	5	5	4	4	3	4	6	6	4	3	5	4	3	5	5	4	7	6	6
111	8	7	4	7	6	5	5	7	5	5	7	5	7	7	4	6	4	5	4	4	4	5	4	4	6	7	5	6	5
111	8	5	6	6	5	6	5	7	6	7	5	5	5	5	4	6	4	6	6	7	2	6	3	3	7	5	7	7	7
112	8	7	6	7	6	7	5	7	6	5	5	4	6	7	4	6	7	7	7	4	5	4	5	6	7	7	7	6	7
112	8	5	7	5	7	6	7	5	5	4	5	6	6	6	4	4	3	3	4	4	4	3	5	4	6	4	6	6	7
112	8	5	6	6	4	7	7	6	7	7	4	6	4	5	4	4	5	6	4	6	2	3	5	2	6	4	5	5	7
113	6	6	5	7	5	5	3	4	5	6	6	6	6	6	7	6	7	7	6	5	7	6	6	7	7	7	7	7	7
113	6	7	6	5	4	5	7	7	4	4	6	6	5	6	6	5	7	5	7	6	6	5	5	6	7	7	7	7	7
113	6	6	6	6	4	6	3	5	6	7	6	6	6	7	5	7	5	7	5	5	5	7	7	5	7	7	7	7	7
113	6	5	6	7	5	6	4	5	5	5	5	7	5	7	6	6	6	6	6	6	5	6	7	6	7	7	7	7	7
114	6	7	6	7	5	4	6	3	5	5	5	5	5	7	7	5	5	5	7	8	7	6	5	7	7	7	7	7	7
114	6	6	7	4	4	7	7	5	5	5	7	6	5	5	5	7	7	6	7	6	5	4	6	7	7	7	7	7	7
114	6	5	5	7	4	5	6	4	4	6	6	7	6	7	7	5	7	5	6	4	7	6	6	6	7	7	7	7	7
115	6	5	5	5	3	5	6	6	4	4	6	5	5	5	6	5	7	6	7	6	7	7	5	5	7	7	7	7	7
115	6	7	6	6	5	4	3	7	4	7	6	6	5	5	7	6	6	6	5	7	7	5	5	7	7	7	7	7	7
115	6	6	7	7	5	6	6	3	6	6	5	6	7	7	7	7	7	6	6	5	7	6	4	7	7	7	7	7	7
116	6	4	6	6	2	2	2	3	3	2	3	5	6	5	3	7	6	4	5	7	6	7	6	7	1	3	2	3	3
116	6	5	4	5	4	3	2	3	3	4	7	6	3	4	5	3	6	3	4	7	6	7	6	6	2	3	2	1	3
116	6	6	4	5	4	4	3	4	4	2	6	4	4	6	5	7	5	5	4	5	5	7	5	4	1	1	1	3	1
117	6	6	6	5	4	2	3	3	3	3	4	6	4	4	6	4	4	5	6	6	6	5	7	6	2	1	1	2	2
117	6	6	6	5	4	3	2	3	4	3	3	6	4	6	4	4	5	6	5	6	6	5	7	6	3	3	3	2	1
117	6	4	3	4	3	3	2	4	3	2	3	6	4	5	6	6	6	5	6	5	6	7	5	6	1	2	3	3	1
118	6	6	4	6	3	4	2	2	3	3	5	7	6	7	4	5	4	5	5	3	5	7	7	6	2	1	2	1	3
118	6	4	6	6	3	2	3	5	5	3	4	6	6	7	6	4	4	6	4	4	6	5	5	7	2	2	4	4	2
118	6	5	4	4	2	3	4	3	2	2	6	3	6	5	4	7	3	4	5	5	6	5	7	6	2	1	2	1	1
119	8	4	4	4	3	6	4	6	3	6	7	5	4	3	4	4	7	4	6	5	7	5	5	7	6	6	6	7	4
119	8	6	6	6	6	4	7	5	7	3	4	6	6	5	5	6	6	4	5	6	6	6	6	6	7	7	7	6	4
119	8	5	4	6	4	6	4	4	5	7	6	6	5	4	3	4	5	6	5	4	6	7	5	6	6	7	5	7	5
120	8	6	5	4	5	3	7	5	7	4	6	6	4	4	4	6	4	4	6	4	6	5	6	6	6	6	5	7	6
120	8	7	3	6	4	6	4	4	7	5	4	4	6	5	4	6	5	4	6	6	6	5	7	6	5	6	5	7	5
120	8	3	6	5	4	6	5	6	4	4	4	4	4	7	7	5	6	4	5	6	7	5	6	7	7	7	6	5	7
121	8	7	4	5	7	4	7	7	5	5	3	6	5	5	5	5	7	4	5	5	6	7	6	5	5	7	6	7	7
121	8	4	6	3	3	4	7	4	6	6	7	5	5	6	4	4	4	4	6	4	7	5	6	6	7	7	6	5	5
121	8	6	5	5	3	6	3	5	5	3	6	5	6	5	4	7	6	4	4	4	7	6	4	7	6	6	5	7	4
122	8	5	6	5	6	5	6	4	4	6	4	5	4	4	3	4	5	5	7	6	5	7	6	7	7	5	5	7	7
122	8	5	6	6	7	7	4	4	4	5	4	5	5	3	5	5	5	4	4	7	6	6	5	6	7	7	6	6	6
122	8	4	3	5	6	6	4	3	6	3	6	4	4	6	5	7	7	6	5	6	6	5	7	6	5	5	7	5	5
123	8	6	6	5	7	7	5	5	4	7	5	6	5	7	3	4	4	7	5	4	7	7	7	7	2	2	2	4	2
123	8	5	6	5	7	5	6	6	7	7	6	5	3	6	3	6	6	5	5	4	7	7	7	7	2	1	2	2	2
123	8	7	7	7	6	7	6	4	5	7	4	6	5	7	7	5	3	6	4	4	7	7	7	7	3	3	1	1	1
124	8	6	8	6	5	7	7	6	6	7	4	6	5	5	4	4	6	5	7	4	7	7	7	7	1	1	3	2	1
124	8	6	5	6	6	7	5	5	5	7	4	7	5	6	6	5	4	5	5	4	7	7	7	7	1	2	4	3	4
124	8	4	7	6	7	4	4	6	7	7	5	7	4	4	4	4	6	5	6	4	7	7	7	7	1	1	1	3	2
125	8	7	5	5	7	6	7	5	6	7	3	6	5	4	5	5	4	4	6	5	7	7	7	7	3	1	1	2	1
125	8	5	5	7	5	5	6	5	7	5	3	5	6	6	7	4	7	6	4	4	7	7	7	7	2	2	2	1	4
125	8	7	6	7	5	7	7	5	6	7	5	5	7	5	4	6	4	5	4	6	7	7	7	7	4	2	2	2	1
125	8	5	6	7	5	6	7	5	6	7	4	6	4	6	5	5	5	5	4	6	7	7	7	7	1	2	3	2	2
126	8	6	6	6	6	7	7	5	5	6	5	6	3	3	4	5	4	6	6	4	7	7	7	7	2	3	2	2	1
126	8	8	6	6	6	7	6	6	5	5	4	5	5	6	5	6	6	6	6	3	7	7	7	7	2	2	1	2	3
126	8	5	5	6	6	7	7	6	6	5	5	4	5	4	4	6	5	7	5	7	7	7	7	7	4	1	2	1	2
127	6	7	7	7	7	6	6	3	4	4	6	4	5	2	4	5	5	5	3	3	3	5	3	4	4	3	3	2	2
127	6	4	4	6	6	6	5	5	5	5	5	5	5	2	3	4	4	5	3	3	5	5	6	4	5	3	4	3	2
127	6	6	6	7	4	3	3	6	6	6	4	4	4	5	3	4	4	3	4	4	7	6	5	7	3	1	5	3	2
128	6	6	5	7	7	5	4	6	4	3	5	4	5	2	4	5	5	5	4	3	3	5	7	6	3	3	4	3	3
128	6	4	6	7	5	4	5	6	5	6	4	3	5	3	4	4	4	5	3	3	5	5	6	6	3	4	2	3	3
128	6	5	7	7	4	4	5	6	5	6	5	4	4	5	3	4	4	3	4	4	7	3	4	3	5	2	3	2	2
129	6	4	7	4	7	6	6	5	5	4	5	2	5	2	4	5	5	5	3	3	4	4	7	6	3	2	5	4	5
129	6	6	7	7	3	6	3	4	7	7	4	5	5	5	3	4	4	4	3	3	5	3	6	5	2	3	3	2	2
129	6	7	5	7	4	5	5	5	4	4	4	4	4	5	3	4	4	5	4	4	5	5	5	5	3	1	4	5	1
130	6	5	6	3	4	5	3	2	2	4	7	4	6	4	5	4	6	4	7	5	6	7	5	6	3	3	4	3	5
130	6	4	4	4	3	4	6	4	4	5	3	6	6	4	4	5	5	4	5	7	7	5	6	5	5	3	5	5	4
130	6	3	4	3	6	4	2	3	5	6	7	7	4	4	4	4	5	6	4	4	6	7	6	6	3	3	6	5	3
131	6	5	3	3	5	3	4	4	5	6	6	5	6	5	4	4	6	5	5	4	6	6	6	6	3	4	3	3	5
131	6	5	6	5	4	3	4	2	4	3	5	4	4	5	7	6	6	6	4	5	7	5	5	7	4	4	5	4	4
131	6	4	2	3	3	4	5	6	3	4	5	5	4	5	3	6	4	3	6	7	6	7	5	6	5	4	5	3	4
132	6	3	5	4	3	3	5	5	3	4	4	4	5	3	5	5	4	6	5	6	6	6	5	7	4	3	5	5	5
132	6	3	5	5	5	3	3	4	5	3	4	5	5	4	4	7	7	6	5	5	6	4	6	6	3	3	5	4	3
132	6	4	3	4	4	4	5	4	6	3	7	6	4	5	4	5	6	3	5	6	7	7	5	7	3	5	4	4	4
133	10	4	2	4	7	7	7	7	7	7	4	5	7	7	6	5	7	6	7	5	5	6	6	6	7	7	7	7	7
133	10	2	5	2	7	7	7	7	7	7	4	4	6	6	7	5	6	6	7	7	7	7	5	5	7	7	7	7	7
133	10	2	3	3	7	7	7	7	7	7	6	7	7	6	7	6	6	5	7	6	6	6	6	7	7	7	7	7	7
134	10	4	4	2	7	7	7	7	7	7	6	7	7	7	5	5	7	7	7	7	7	7	5	6	7	7	7	7	7
134	10	2	2	3	7	7	7	7	7	7	5	6	5	5	6	7	5	4	5	4	6	5	7	7	7	7	7	7	7
134	10	4	3	3	7	7	7	7	7	7	7	7	7	7	5	5	7	6	7	5	7	5	6	4	7	7	7	7	7
135	10	2	3	2	7	7	7	7	7	7	6	7	5	7	6	7	7	5	5	6	7	6	6	5	7	7	7	7	7
135	10	3	4	2	7	7	7	7	7	7	5	5	7	6	6	6	5	6	7	6	5	5	6	7	7	7	7	7	7
135	10	3	4	4	7	7	7	7	7	7	5	6	6	7	7	7	7	4	4	7	7	6	7	5	7	7	7	7	7
135	10	2	3	4	7	7	7	7	7	7	5	6	7	6	6	6	6	6	6	6	5	6	7	6	7	7	7	7	7
136	10	2	3	4	7	7	7	7	7	7	7	6	4	7	5	7	6	7	7	6	7	7	6	5	7	7	7	7	7
136	10	4	3	3	7	7	7	7	7	7	7	6	7	6	6	7	5	6	5	5	5	5	5	6	7	7	7	7	7
136	10	3	2	3	7	7	7	7	7	7	6	7	4	6	7	5	7	6	6	4	7	5	7	7	7	7	7	7	7
137	10	3	5	3	7	7	7	7	7	7	6	7	5	5	7	7	7	6	7	5	5	7	5	7	7	7	7	7	7
137	10	3	4	3	7	7	7	7	7	7	6	5	6	7	6	5	7	6	7	6	7	7	5	5	7	7	7	7	7
137	10	2	2	2	7	7	7	7	7	7	6	5	6	7	7	6	7	4	4	5	6	5	7	6	7	7	7	7	7
138	6	3	5	6	5	7	4	5	6	4	7	5	7	7	3	4	6	6	4	6	4	6	4	6	5	6	5	7	6
138	6	5	5	5	5	6	4	3	7	6	4	5	6	5	5	5	4	4	5	5	6	5	4	4	7	6	7	5	7
138	6	6	5	5	6	6	4	3	6	3	5	4	4	5	4	4	7	4	4	6	6	4	7	4	6	4	6	6	7
139	6	5	6	5	5	6	4	3	4	4	4	5	4	6	5	6	5	5	6	5	6	6	6	4	7	7	7	4	7
139	6	4	5	6	5	5	7	7	5	5	5	6	3	6	4	6	4	5	6	4	3	6	4	5	7	6	7	7	5
139	6	4	5	5	7	7	4	4	4	4	6	5	6	6	5	6	5	4	4	3	6	6	4	4	7	5	5	4	5
140	6	5	5	5	6	6	3	5	5	4	7	5	5	4	3	7	4	4	6	6	5	6	4	5	7	5	6	6	8
140	6	4	6	6	6	6	4	4	6	4	7	4	4	4	4	4	6	6	6	6	5	4	6	5	7	6	7	6	6
140	6	4	6	4	7	5	6	3	5	5	6	7	4	5	5	5	4	5	3	4	5	6	4	5	5	6	5	5	5
141	6	4	3	3	5	4	4	3	4	3	2	3	5	5	4	5	5	5	3	3	3	2	2	2	7	7	7	7	7
141	6	2	3	3	3	3	3	5	6	5	4	3	5	6	3	4	4	5	3	3	3	4	4	2	7	7	7	7	7
141	6	4	3	2	4	5	6	3	3	3	3	4	4	5	3	4	4	5	4	4	4	2	5	3	7	7	7	7	7
142	6	4	3	4	5	4	4	5	4	4	2	4	5	3	4	5	5	5	3	3	2	3	3	4	7	7	7	7	7
142	6	3	3	2	5	3	3	5	4	3	5	4	5	4	3	4	4	5	3	3	4	2	2	2	7	7	7	7	7
142	6	2	4	2	2	4	4	4	3	6	6	5	4	5	3	4	4	2	4	4	4	4	3	3	7	7	7	7	7
143	6	2	3	4	5	4	4	4	4	4	4	5	5	2	4	5	5	5	3	3	2	3	2	3	7	7	7	7	7
143	6	2	2	4	2	3	2	4	6	6	4	4	5	4	3	4	4	5	3	3	4	2	2	4	7	7	7	7	7
143	6	4	2	4	2	3	6	5	5	3	4	4	4	5	3	4	4	4	4	4	3	4	3	4	7	7	7	7	7
144	6	7	5	7	7	5	6	6	7	5	4	6	7	3	5	3	5	7	5	5	6	5	7	6	2	3	5	4	3
144	6	3	6	6	4	5	7	7	5	7	5	4	5	3	7	7	6	3	6	4	7	5	7	6	4	6	2	5	4
144	6	7	6	6	5	7	7	7	7	4	5	5	4	5	4	6	6	4	7	4	7	5	5	6	5	5	3	4	5
145	6	7	7	6	7	6	5	6	6	6	7	6	6	3	5	5	6	4	6	3	6	5	5	5	4	5	6	4	3
145	6	7	5	5	4	5	7	6	7	7	6	6	3	4	6	6	4	4	3	6	7	7	6	6	3	4	3	3	5
145	6	5	7	5	5	6	6	7	5	7	4	7	6	4	6	5	5	4	5	5	6	6	7	6	6	3	2	5	4
146	6	7	5	5	7	7	5	7	5	7	4	4	5	4	4	4	4	5	4	4	5	5	7	7	5	2	4	4	5
146	6	6	5	6	7	5	5	4	5	6	6	3	6	5	4	6	5	5	6	5	6	7	5	6	4	5	3	5	2
146	6	7	6	7	6	4	7	7	7	7	5	5	6	5	7	6	7	5	7	4	7	5	7	5	3	5	4	5	4
146	6	5	6	7	5	5	7	7	6	6	4	4	6	6	5	5	5	5	5	5	7	5	6	6	3	5	3	5	4
147	6	4	5	4	4	3	4	5	4	2	4	6	7	5	6	5	7	3	4	5	1	1	3	2	4	2	4	2	2
147	6	3	5	3	4	5	4	4	5	4	4	7	6	3	4	4	5	6	4	4	3	1	1	2	3	2	4	5	2
147	6	3	4	5	2	4	4	6	4	4	5	6	5	6	7	5	4	5	5	3	2	3	1	4	4	4	2	2	3
148	6	4	5	4	4	4	2	3	4	5	4	4	5	3	7	6	4	6	5	3	1	3	2	3	3	3	3	4	2
148	6	4	5	3	3	4	6	5	4	3	7	5	6	6	3	3	6	5	6	4	3	2	3	2	3	2	5	3	2
148	6	5	3	3	3	5	2	4	5	6	6	6	6	5	5	6	4	6	4	4	1	2	1	1	4	4	2	2	3
149	6	5	3	5	4	3	5	4	2	4	5	4	5	6	4	5	6	5	5	4	1	3	2	2	3	3	4	2	2
149	6	4	4	3	3	6	6	4	4	4	5	4	5	6	5	5	7	6	6	4	1	1	2	2	3	2	4	4	3
149	6	5	4	3	3	4	5	3	3	5	5	4	4	4	5	5	5	5	7	4	2	3	3	2	1	2	3	4	5
150	6	5	7	6	7	6	4	6	5	4	7	4	6	6	4	5	5	5	4	4	3	4	3	4	1	3	2	2	1
150	6	7	6	5	5	6	4	3	4	7	4	4	4	6	6	4	4	6	5	7	2	3	3	5	2	1	1	3	4
150	6	7	5	6	5	6	3	3	6	6	4	5	3	5	4	6	7	5	4	7	2	1	4	2	2	1	1	4	2
151	6	7	7	6	5	4	5	5	5	4	4	6	4	7	4	6	6	3	5	3	2	1	2	4	1	1	3	1	1
151	6	4	7	6	4	7	4	5	7	4	5	5	5	5	5	4	5	4	4	5	5	3	1	4	3	4	1	2	3
151	6	5	6	6	5	5	6	5	4	6	7	5	5	4	6	6	6	5	5	6	4	4	4	2	3	2	1	1	3
152	6	7	7	5	5	5	7	6	6	4	4	7	5	6	4	5	5	4	5	5	5	2	5	4	3	1	3	1	4
152	6	5	5	5	5	4	4	5	4	4	6	6	5	4	6	4	5	6	5	4	1	2	3	4	1	1	2	1	1
152	6	7	7	6	5	7	6	3	4	6	5	4	5	4	5	5	5	4	6	6	1	2	3	4	1	3	3	4	1
153	6	6	7	7	7	7	7	7	7	7	7	7	7	7	7	7	7	7	7	7	7	7	7	7	3	5	3	2	1
153	6	4	6	6	7	7	7	7	7	7	7	7	7	7	7	7	7	7	7	7	7	7	7	7	3	2	1	2	4
153	6	7	5	6	7	7	7	7	7	7	7	7	7	7	7	7	7	7	7	7	7	7	7	7	5	3	3	4	4
154	6	5	6	6	7	7	7	7	7	7	7	7	7	7	7	7	7	7	7	7	7	7	7	7	2	3	2	5	4
154	6	6	5	6	7	7	7	7	7	7	7	7	7	7	7	7	7	7	7	7	7	7	7	7	4	2	2	3	2
154	6	6	7	7	7	7	7	7	7	7	7	7	7	7	7	7	7	7	7	7	7	7	7	7	2	5	3	1	5
155	6	4	4	7	7	7	7	7	7	7	7	7	7	7	7	7	7	7	7	7	7	7	7	7	2	4	2	4	4
155	6	6	7	7	7	7	7	7	7	7	7	7	7	7	7	7	7	7	7	7	7	7	7	7	3	4	4	2	4
155	6	5	7	7	7	7	7	7	7	7	7	7	7	7	7	7	7	7	7	7	7	7	7	7	1	1	3	4	3
155	6	5	6	7	7	7	7	7	7	7	7	7	7	7	7	7	7	7	7	7	7	7	7	7	2	3	4	4	2
156	10	5	4	5	2	4	5	5	3	3	6	5	5	2	4	4	3	5	3	3	6	6	6	3	5	6	5	6	6
156	10	5	4	3	4	3	2	6	3	6	5	5	5	5	3	4	4	5	3	3	5	5	5	4	5	4	3	5	4
156	10	4	4	2	4	5	5	2	5	5	4	4	4	5	3	4	4	2	4	4	3	6	6	5	5	7	7	4	3
157	10	3	5	3	3	5	3	5	2	5	6	5	4	3	4	4	5	5	3	3	6	6	6	4	4	6	4	4	4
157	10	4	3	4	5	3	6	4	6	2	4	5	5	4	3	4	4	5	3	3	3	5	4	5	5	3	5	5	5
157	10	5	5	4	3	5	3	4	4	4	4	4	4	5	3	4	4	2	4	4	7	7	4	3	7	6	5	6	6
158	10	5	5	6	3	4	5	4	4	5	5	5	5	2	4	5	5	5	3	3	4	6	4	4	5	5	3	6	4
158	10	5	3	4	5	5	3	3	3	5	4	5	5	4	3	4	4	4	3	3	4	5	5	5	4	5	5	4	7
158	10	3	3	2	5	5	3	4	4	2	2	5	4	5	3	4	4	4	4	4	5	5	7	6	6	5	4	6	6
159	10	4	4	4	3	3	2	5	4	5	3	3	5	4	4	5	5	5	3	3	5	5	5	5	5	6	4	7	4
159	10	3	3	3	3	4	4	4	4	4	3	5	5	4	3	4	4	4	3	3	7	3	6	4	5	5	5	7	6
159	10	5	5	5	4	4	5	5	5	4	3	4	4	5	4	4	4	6	4	4	4	5	4	7	3	4	5	4	5
160	10	3	5	4	6	2	6	3	5	3	6	3	5	2	4	5	5	5	3	3	5	6	5	4	4	6	4	4	7
160	10	3	3	5	3	2	3	5	5	2	5	4	5	3	3	4	4	3	5	3	6	6	5	3	5	6	4	5	6
160	10	5	5	3	5	3	4	5	5	5	6	4	4	5	3	4	4	2	4	4	4	7	4	5	6	4	6	4	4
161	10	6	5	4	7	7	6	7	7	7	5	7	7	6	5	7	6	5	6	5	7	7	7	7	3	4	5	2	2
161	10	5	4	6	7	5	4	7	6	4	5	6	7	7	5	6	7	5	5	7	7	7	7	7	2	2	5	4	5
161	10	4	6	5	5	5	5	7	7	5	8	6	6	5	5	6	7	7	5	6	7	7	7	7	2	1	2	4	2
162	10	5	4	3	7	6	5	7	6	4	4	5	5	7	5	5	4	7	7	5	7	7	7	7	2	4	3	3	4
162	10	5	5	5	6	7	6	6	6	6	7	7	7	5	6	7	6	5	7	5	7	7	7	7	4	2	4	2	2
162	10	5	6	7	7	7	6	5	7	4	5	7	7	7	7	6	6	7	7	5	7	7	7	7	1	3	3	3	5
163	10	6	4	5	6	7	7	6	4	7	6	7	4	7	6	5	7	7	7	4	7	7	7	7	4	4	3	3	3
163	10	6	4	5	6	4	7	7	6	7	6	5	5	7	6	6	7	5	7	6	7	7	7	7	1	1	4	3	1
163	10	5	4	6	5	4	6	7	5	7	6	7	6	5	5	6	7	6	7	5	7	7	7	7	4	5	4	3	2
164	10	6	6	4	6	7	5	5	7	7	7	5	6	7	7	5	5	6	6	7	7	7	7	7	5	2	2	2	3
164	10	4	4	4	4	6	6	6	7	7	6	6	5	6	6	6	5	6	5	7	7	7	7	7	3	2	3	4	4
164	10	4	6	7	4	7	7	4	6	7	6	7	6	6	6	7	5	7	6	5	7	7	7	7	3	2	2	4	4
165	10	3	4	5	6	7	6	5	6	6	6	6	5	5	7	7	7	7	7	7	7	7	7	7	2	3	2	3	3
165	10	6	4	6	7	6	6	7	6	4	5	5	5	4	7	6	6	6	7	6	7	7	7	7	3	2	3	3	4
165	10	5	6	6	7	6	4	6	6	7	5	6	7	6	5	6	5	6	6	7	7	7	7	7	5	5	3	2	2
166	6	4	4	4	5	6	5	6	7	5	6	5	7	7	4	5	5	7	7	6	7	6	6	6	1	1	1	1	1
166	6	6	5	5	7	6	7	5	7	6	6	7	5	6	5	6	5	7	6	7	6	6	6	6	1	1	1	1	1
166	6	5	7	5	6	7	7	5	7	4	7	7	4	7	6	7	5	7	4	7	6	6	5	6	1	1	1	1	1
166	6	6	5	4	6	6	7	5	7	5	7	5	6	6	7	5	6	6	6	6	6	7	5	6	1	1	1	1	1
167	6	6	5	4	6	7	7	6	4	7	7	6	6	7	6	6	6	5	7	7	6	6	6	7	1	1	1	1	1
167	6	6	5	7	5	7	5	7	6	7	7	5	6	5	7	7	5	5	5	6	7	5	5	4	1	1	1	1	1
167	6	4	4	4	5	7	6	5	5	6	5	7	7	6	6	5	5	5	7	6	7	7	6	6	1	1	1	1	1
168	6	4	6	5	6	4	5	6	5	5	6	5	7	6	6	5	6	6	7	7	5	6	5	7	1	1	1	1	1
168	6	4	3	5	7	5	7	7	7	7	5	7	7	7	5	5	7	5	6	6	7	6	7	5	1	1	1	1	1
168	6	6	6	6	7	6	7	7	5	5	6	6	7	6	5	6	7	5	5	6	6	6	5	7	1	1	1	1	1
169	6	7	5	6	7	7	7	7	7	7	6	7	6	7	6	5	7	6	6	6	7	5	7	5	3	2	3	1	2
169	6	6	6	5	7	7	7	7	7	7	7	6	7	6	6	7	6	5	4	6	6	7	6	5	1	5	1	5	3
169	6	6	7	6	7	7	7	7	7	7	7	6	5	6	5	6	5	6	7	5	7	5	7	5	5	3	5	2	4
170	6	4	6	6	7	7	7	7	7	7	5	7	7	6	4	6	6	7	7	7	6	5	6	6	4	3	4	2	3
170	6	6	7	6	7	7	7	7	7	7	7	7	6	7	6	5	6	7	6	4	7	6	5	5	3	1	3	3	4
170	6	6	6	7	7	7	7	7	7	7	7	7	5	5	5	4	7	5	5	7	7	7	5	7	3	4	3	4	1
171	6	6	6	6	7	7	7	7	7	7	6	6	7	4	6	7	6	6	6	6	5	6	5	6	3	2	2	3	3
171	6	7	7	5	7	7	7	7	7	7	6	6	7	6	5	5	7	7	6	4	7	7	7	6	3	4	3	3	2
171	6	5	7	5	7	7	7	7	7	7	6	7	5	6	7	7	6	5	6	6	7	5	5	6	4	4	3	3	3
172	6	2	3	1	1	2	3	3	2	3	1	1	1	2	2	2	3	3	5	3	6	5	7	7	6	6	7	6	6
172	6	2	1	4	4	3	2	4	4	4	5	3	5	2	4	4	3	4	2	5	5	7	7	6	5	5	5	7	7
172	6	1	2	2	4	2	2	3	5	3	4	1	3	3	4	3	4	3	4	1	7	5	5	5	6	4	6	7	7
173	6	2	2	2	3	4	2	3	3	4	3	2	2	3	4	2	4	3	3	2	6	5	5	5	7	6	6	5	6
173	6	2	2	2	2	4	3	2	3	4	4	4	3	3	3	3	1	4	5	4	6	5	7	6	6	5	5	6	5
173	6	2	2	2	2	2	4	4	3	2	2	2	2	4	2	5	1	3	4	3	6	7	7	7	7	5	7	7	7
174	6	2	2	2	4	3	3	2	3	5	3	4	2	3	4	1	2	1	5	3	7	5	5	5	5	6	7	6	7
174	6	2	3	1	3	4	2	2	3	2	2	2	2	5	5	4	3	2	2	3	7	6	6	7	7	5	6	6	6
174	6	3	1	2	5	2	2	3	2	4	3	5	4	4	3	4	4	3	1	1	7	7	5	5	7	6	6	5	5
175	6	5	6	7	5	6	5	4	7	4	5	5	5	5	4	5	5	5	3	3	7	7	7	7	5	4	6	6	7
175	6	6	7	6	6	6	4	4	6	6	3	5	5	5	3	4	4	3	3	3	7	7	7	7	5	6	4	6	4
175	6	6	5	6	5	6	3	4	4	5	3	2	4	5	3	4	4	4	4	4	7	7	7	7	6	3	4	4	5
176	6	6	7	5	7	4	5	4	5	5	4	5	5	2	4	5	5	5	3	3	7	7	7	7	4	4	6	4	5
176	6	7	7	4	4	5	6	6	4	5	5	5	5	5	3	4	4	2	4	3	7	7	7	7	4	7	6	6	6
176	6	6	6	6	5	4	7	4	4	6	3	3	4	5	5	4	4	3	4	4	7	7	7	7	6	5	4	3	5
177	6	6	6	7	4	4	6	6	4	5	3	3	5	5	4	5	5	5	3	3	7	7	7	7	5	4	5	6	6
177	6	4	7	5	5	7	4	4	4	5	4	5	5	5	3	4	4	2	3	3	7	7	7	7	6	6	4	4	4
177	6	7	7	5	7	4	4	5	6	6	5	4	4	5	5	4	4	2	4	4	7	7	7	7	5	5	4	6	5
177	6	7	5	6	6	6	4	4	5	5	4	4	4	4	4	4	4	4	5	3	7	7	7	7	4	6	4	6	5
178	6	5	6	5	2	2	2	4	3	3	2	4	5	2	4	5	5	5	3	3	6	7	6	6	3	3	4	5	4
178	6	5	5	5	2	5	3	3	3	2	6	4	5	6	3	4	4	4	3	3	6	5	7	5	2	2	2	4	2
178	6	4	5	5	3	2	4	4	4	3	4	3	4	5	5	4	4	4	3	4	5	7	5	7	3	2	2	4	3
179	6	3	3	5	3	3	2	2	3	1	3	4	5	3	4	5	5	5	3	3	5	6	7	6	3	4	2	3	4
179	6	6	6	4	4	5	2	4	2	4	3	6	5	4	3	4	4	5	3	3	7	7	5	5	1	2	1	4	3
179	6	6	5	7	3	2	3	2	4	5	3	5	4	5	3	4	4	4	4	4	6	7	6	5	2	4	2	5	5
180	6	7	7	6	2	4	3	2	2	3	5	4	5	2	4	5	5	5	3	3	6	6	5	7	4	3	4	2	2
180	6	4	3	4	3	3	3	4	2	3	4	5	4	5	3	4	4	4	3	3	6	6	7	5	3	3	4	4	3
180	6	5	6	3	2	5	3	2	4	4	5	5	4	5	3	4	4	2	4	4	5	7	5	7	4	4	3	1	1
181	10	6	5	6	4	5	5	5	7	7	4	1	5	3	4	3	3	3	3	2	4	2	5	5	4	1	2	1	2
181	10	5	5	6	5	7	5	4	6	4	4	2	3	2	2	3	3	3	3	4	3	4	5	3	1	1	1	2	3
181	10	7	7	7	5	5	5	4	3	4	3	3	3	2	5	2	3	4	2	3	6	5	2	4	4	2	2	1	3
182	10	6	6	6	5	6	5	4	4	5	2	4	1	2	3	5	4	2	5	4	4	4	3	5	1	4	1	1	4
182	10	5	7	7	7	5	6	5	4	5	5	1	1	3	3	2	2	4	4	4	4	4	4	3	4	2	1	2	1
182	10	5	5	7	6	6	4	4	4	5	3	2	3	3	2	2	2	3	5	4	3	6	4	4	4	1	2	1	1
183	10	7	6	6	6	5	5	6	3	5	2	3	3	5	3	4	5	1	2	2	4	3	4	4	1	2	3	4	1
183	10	7	5	6	4	6	7	5	5	4	4	3	1	4	3	2	2	4	2	5	3	5	5	3	2	1	4	1	1
183	10	7	5	5	3	5	4	5	6	6	5	1	2	1	3	5	3	2	4	4	4	4	5	4	1	1	3	3	2
184	10	5	6	6	6	3	5	5	4	7	2	3	3	1	5	5	3	2	3	2	4	5	5	3	1	2	1	1	4
184	10	4	6	6	3	4	4	7	4	7	1	2	4	4	4	3	2	4	4	3	4	5	5	3	1	2	2	3	2
184	10	7	7	7	4	6	5	5	5	6	5	3	1	4	3	3	4	1	1	5	3	3	5	3	3	2	3	1	2
185	10	7	7	5	4	6	5	6	6	4	5	2	2	4	2	2	3	2	4	4	4	3	5	3	2	2	3	1	3
185	10	7	6	6	3	7	3	7	4	4	2	1	4	3	2	2	4	4	4	4	5	4	3	5	2	3	3	1	1
185	10	6	5	5	6	5	5	5	4	6	1	5	5	4	3	2	1	2	4	3	3	4	3	6	3	1	2	1	2
186	10	6	5	5	5	7	6	5	5	5	6	4	4	4	7	5	7	7	4	4	5	5	7	5	1	1	1	1	1
186	10	5	5	7	6	7	5	7	4	7	5	5	5	6	4	5	5	5	6	4	5	5	6	4	1	1	1	1	1
186	10	4	4	4	6	6	7	7	6	7	4	4	5	6	7	4	3	5	4	6	4	4	6	4	1	1	1	1	1
187	10	5	5	4	6	6	7	6	7	4	4	4	6	5	6	5	3	6	6	7	4	7	5	6	1	1	1	1	1
187	10	5	4	6	6	5	4	6	6	7	4	4	4	4	5	7	6	6	5	6	4	4	6	6	1	1	1	1	1
187	10	6	7	3	7	7	6	6	7	5	7	6	3	4	4	7	3	6	3	4	4	6	4	4	1	1	1	1	1
188	10	6	4	5	7	7	7	5	7	6	4	4	6	6	6	5	4	5	5	6	5	4	6	6	1	1	1	1	1
188	10	6	6	4	7	7	6	5	5	5	6	5	4	4	7	5	5	4	5	5	5	5	6	4	1	1	1	1	1
188	10	4	5	5	4	6	7	5	7	5	6	4	5	4	7	4	6	6	4	3	6	4	6	3	1	1	1	1	1
189	10	6	4	5	7	7	6	5	5	5	5	4	4	4	4	6	5	6	6	6	6	5	5	4	1	1	1	1	1
189	10	5	6	6	6	4	7	7	7	7	7	6	4	5	6	6	6	4	4	4	4	6	5	5	1	1	1	1	1
189	10	5	4	4	5	4	5	7	7	7	4	6	5	3	5	4	6	4	4	7	4	7	6	3	1	1	1	1	1
189	10	5	5	5	6	6	6	6	6	6	5	5	5	5	5	5	5	5	5	5	5	5	5	5	1	1	1	1	1
190	10	6	4	4	5	5	7	6	7	6	4	5	3	6	5	5	6	5	3	5	6	4	5	4	1	1	1	1	1
190	10	5	6	5	6	5	7	6	7	5	6	6	3	4	6	6	4	4	4	5	3	5	5	6	1	1	1	1	1
190	10	6	5	4	7	6	7	5	5	6	5	6	4	7	4	7	6	4	6	6	5	6	6	5	1	1	1	1	1
191	6	4	5	5	6	5	5	5	7	7	6	6	6	4	7	5	4	6	5	7	5	3	4	4	6	7	7	7	6
191	6	7	5	5	6	6	6	6	7	6	6	7	6	7	7	7	7	7	7	6	5	5	3	3	5	7	5	6	5
191	6	5	6	3	5	5	5	7	7	7	6	7	5	7	5	4	6	4	7	6	4	4	4	4	7	5	5	5	7
192	6	5	4	4	5	6	4	5	7	5	6	7	6	7	5	6	7	6	6	5	5	3	4	4	7	5	7	5	7
192	6	7	5	6	7	6	6	6	6	7	6	6	7	6	7	7	7	7	5	7	3	3	5	4	6	7	7	4	7
192	6	6	4	4	5	7	5	7	7	7	7	5	6	5	5	5	5	5	4	7	4	5	5	3	6	5	6	6	5
193	6	4	7	7	6	6	6	7	7	5	6	6	7	6	6	7	7	7	6	5	5	3	3	5	4	5	7	6	7
193	6	4	6	4	5	4	7	7	7	6	7	5	6	7	6	5	7	6	6	6	4	5	4	3	7	5	5	6	6
193	6	4	5	4	5	5	5	7	7	6	5	5	5	7	5	6	5	5	6	7	5	3	5	3	6	7	7	7	5
194	6	7	5	6	7	6	6	7	6	7	6	5	4	6	5	6	4	6	5	4	5	6	5	5	4	2	5	3	4
194	6	4	5	6	7	5	7	5	6	4	5	6	6	7	3	5	7	3	5	5	5	5	5	5	3	3	3	3	2
194	6	7	7	7	6	5	5	7	6	6	6	4	7	4	3	3	5	5	5	5	4	6	5	4	4	2	3	2	2
195	6	7	5	5	7	6	4	6	6	6	5	6	6	5	6	4	4	4	6	6	5	5	4	4	3	3	3	2	4
195	6	7	4	7	5	5	6	7	7	5	6	4	4	5	5	4	6	5	6	5	6	6	5	4	3	3	3	2	5
195	6	5	7	7	5	7	5	6	8	7	4	6	5	5	5	4	6	5	4	4	5	6	4	6	2	3	4	2	3
196	6	6	6	6	7	4	7	6	6	5	4	6	6	4	5	5	4	6	5	6	5	6	4	6	2	4	1	2	3
196	6	6	7	5	6	5	7	7	6	5	5	3	5	4	6	6	6	6	4	5	5	6	6	4	5	4	2	5	4
196	6	4	7	7	7	6	7	5	6	6	4	4	4	5	6	5	5	4	6	6	4	4	4	6	5	1	1	3	3
197	6	4	5	6	7	6	4	6	4	6	4	2	2	4	4	3	3	3	3	3	4	6	6	5	5	4	4	4	5
197	6	4	4	4	5	5	6	4	4	4	5	4	2	3	3	1	1	5	2	4	4	5	4	4	5	5	4	3	4
197	6	3	3	3	6	3	7	3	5	5	5	3	4	1	3	5	1	2	2	3	4	6	6	6	5	3	2	3	4
198	6	5	3	4	5	4	5	4	6	4	2	2	4	3	2	2	2	3	3	3	4	3	6	6	3	4	4	4	4
198	6	4	5	3	5	6	5	7	6	5	3	2	4	5	4	2	1	5	1	4	5	5	7	4	5	3	4	3	3
198	6	3	4	5	6	4	5	3	6	4	5	3	5	1	4	3	2	4	4	2	6	3	6	5	5	6	5	3	4
199	6	4	5	4	7	5	4	3	5	5	4	2	1	4	4	4	5	2	3	4	7	3	5	4	4	5	6	4	3
199	6	3	5	3	6	5	4	6	5	4	4	2	1	3	1	4	2	3	3	4	6	3	6	4	4	2	4	3	3
199	6	4	2	6	6	4	4	6	6	5	1	3	1	4	3	4	5	1	4	4	5	5	6	6	4	5	6	3	4
200	8	4	7	7	6	6	5	5	5	4	5	3	4	5	4	6	7	3	6	5	4	6	6	5	7	5	7	7	6
200	8	5	6	7	7	7	6	7	7	6	6	3	6	6	4	4	5	5	5	6	4	5	5	5	5	5	4	6	6
200	8	5	7	6	7	6	6	5	7	6	7	6	5	4	5	4	3	6	7	5	6	6	3	5	4	7	7	7	7
201	8	7	6	6	4	7	7	7	5	5	6	6	5	4	4	4	4	5	7	6	6	4	5	5	7	7	6	7	7
201	8	5	6	5	7	7	7	7	5	6	4	5	6	3	3	6	5	6	4	6	6	4	5	5	7	7	5	5	7
201	8	7	6	6	5	5	5	7	5	7	6	6	4	6	5	4	5	5	5	5	6	4	5	5	6	4	5	5	5
202	8	6	7	7	5	4	7	4	7	7	6	4	4	5	4	4	6	6	5	5	5	5	6	4	7	7	5	7	6
202	8	5	6	6	5	5	7	6	7	6	5	5	4	5	7	5	4	6	6	4	6	6	4	6	5	7	6	4	6
202	8	5	6	6	6	7	5	7	6	7	5	4	5	6	4	4	5	6	6	5	4	5	5	4	7	5	6	6	6
203	8	5	7	5	7	5	6	6	7	7	6	5	6	5	3	4	3	7	6	4	4	5	6	4	7	7	6	5	7
203	8	5	7	7	7	6	5	6	5	6	4	5	6	6	4	5	6	5	6	4	6	5	5	4	4	6	7	7	6
203	8	7	5	6	5	6	5	6	6	7	6	4	4	5	6	5	5	5	4	6	6	5	5	5	4	7	6	4	7
204	8	5	7	5	7	7	7	4	4	7	7	5	3	4	7	6	5	5	4	4	5	5	7	6	2	2	4	4	4
204	8	6	7	6	7	5	5	7	5	7	4	7	6	4	4	4	4	5	6	6	4	5	6	4	3	2	3	3	2
204	8	7	5	6	6	7	4	6	7	6	5	5	5	4	4	4	5	6	6	6	5	5	5	3	2	2	3	5	4
205	8	7	7	6	7	6	4	7	7	6	4	5	7	5	4	5	6	4	5	6	6	5	4	4	2	2	3	5	3
205	8	6	5	6	5	5	6	7	4	6	4	5	6	4	4	4	4	5	7	4	4	4	3	7	4	5	2	2	2
205	8	7	4	6	7	5	7	6	7	6	6	4	5	6	4	7	4	7	4	5	7	7	4	5	4	3	1	4	3
206	8	4	5	7	6	7	5	5	7	7	5	6	3	6	4	6	4	5	6	6	6	6	6	5	2	2	4	2	5
206	8	6	6	6	7	6	5	5	6	7	4	6	5	4	6	6	5	4	6	6	6	6	4	3	5	2	2	2	3
206	8	6	7	7	4	7	6	5	7	6	7	3	3	4	5	6	6	5	4	4	4	6	4	4	5	3	2	2	4
207	8	4	6	6	7	5	6	5	6	7	4	7	5	4	6	4	5	6	6	5	4	5	4	6	2	3	3	2	5
207	8	6	7	6	7	6	7	5	6	5	7	6	4	6	5	5	3	5	6	5	5	3	6	5	5	3	2	2	2
207	8	6	7	6	4	7	7	6	5	7	3	4	7	4	4	4	4	6	6	4	7	4	5	6	2	2	4	4	4
208	6	5	4	5	4	6	4	6	6	4	5	5	5	6	5	6	5	6	5	4	3	6	5	6	6	5	4	5	5
208	6	5	5	5	7	5	4	5	5	4	4	6	3	5	5	6	6	5	4	3	6	5	4	5	4	4	6	6	5
208	6	6	7	3	7	4	5	5	4	5	3	5	6	4	4	5	4	6	7	7	4	5	6	5	4	5	6	4	6
209	6	7	6	3	7	6	6	5	4	3	5	7	4	5	6	5	7	5	4	3	6	4	5	4	4	6	6	6	4
209	6	5	4	4	4	6	4	6	4	6	6	4	5	5	6	6	4	5	4	5	5	5	5	5	6	6	4	4	6
209	6	4	5	7	5	5	4	5	4	6	4	5	6	5	4	4	4	6	5	6	5	6	6	4	4	4	4	6	5
210	6	4	6	7	3	7	7	4	4	5	4	3	6	3	5	6	6	5	5	6	6	5	4	7	5	4	5	4	4
210	6	4	4	6	6	7	4	5	4	5	7	3	4	6	4	6	4	4	7	6	4	6	7	3	4	6	6	6	4
210	6	4	6	4	7	4	5	3	6	4	5	5	6	5	6	5	4	4	5	5	4	5	6	3	5	6	6	5	5
211	10	4	5	5	3	4	6	4	3	3	4	3	5	2	4	5	5	5	3	3	2	2	4	3	3	4	4	3	5
211	10	3	5	5	4	2	3	4	4	6	5	5	5	5	3	4	4	5	3	3	2	4	1	4	4	5	3	4	4
211	10	6	6	6	6	4	5	4	2	5	3	4	4	5	3	4	4	4	4	4	4	2	4	4	5	3	4	4	5
212	10	6	5	4	4	4	4	4	4	4	3	4	5	3	4	5	5	5	3	3	2	4	5	1	4	6	3	5	4
212	10	4	6	4	3	5	5	3	5	3	4	6	5	4	3	4	4	5	3	3	4	3	2	1	4	2	4	3	3
212	10	6	3	7	3	4	6	3	5	3	4	3	4	5	3	4	4	4	4	4	5	3	4	2	4	2	5	6	5
213	10	5	6	5	3	5	4	4	3	3	5	4	5	4	4	5	5	5	3	3	2	4	2	3	4	5	4	3	3
213	10	4	6	5	6	4	3	5	4	5	5	4	5	5	3	4	4	4	3	3	4	3	3	3	3	5	4	4	5
213	10	5	5	4	5	4	3	5	4	2	4	3	4	5	3	4	4	2	4	4	3	3	1	5	4	5	5	3	3
214	10	4	6	6	3	5	6	4	3	2	4	4	5	3	4	5	5	5	3	3	2	4	2	5	5	4	3	2	4
214	10	5	5	5	5	6	5	2	3	4	3	5	5	4	3	4	4	3	3	3	1	3	4	3	4	4	3	6	5
214	10	5	4	5	3	3	5	6	4	3	6	3	4	5	3	4	4	5	4	4	3	2	3	4	4	4	4	4	4
215	10	4	5	5	4	6	4	4	3	4	4	4	5	5	4	5	5	5	3	3	4	2	2	3	3	3	2	4	6
215	10	6	5	6	4	5	4	4	4	5	4	4	5	4	3	4	4	5	3	3	2	4	3	2	6	3	3	6	5
215	10	4	5	5	2	4	4	3	4	4	4	2	4	5	3	4	4	4	4	4	2	5	3	4	5	3	4	3	4
216	6	4	7	6	6	5	6	5	6	6	4	4	5	7	5	6	3	4	7	6	7	6	5	6	7	4	6	4	6
216	6	5	5	4	7	7	7	6	6	5	5	6	5	4	7	5	6	3	6	3	6	6	7	6	5	7	3	5	4
216	6	4	4	6	5	7	7	6	6	5	4	4	4	3	5	6	6	6	5	6	5	5	6	7	6	3	6	4	5
217	6	5	6	6	5	7	7	7	5	6	6	6	4	4	4	5	4	7	4	4	7	6	7	4	5	6	6	6	6
217	6	6	4	4	5	5	5	7	7	5	4	6	5	5	4	4	4	5	7	6	6	7	7	4	6	4	4	5	3
217	6	4	5	5	4	7	7	5	7	7	6	4	6	4	6	6	6	5	5	4	6	6	5	7	5	6	4	4	5
218	6	5	6	5	7	5	6	7	5	4	5	4	4	4	3	4	4	7	4	6	6	7	4	6	6	4	4	5	6
218	6	4	5	5	5	5	5	7	7	7	5	5	5	3	6	4	5	7	3	6	7	6	7	6	4	5	5	6	4
218	6	5	5	5	7	6	6	7	7	5	5	5	7	6	5	7	6	4	6	5	5	7	5	6	5	5	5	5	6
219	10	5	6	7	6	7	4	7	6	5	7	4	6	7	7	6	7	6	7	5	5	6	6	6	5	4	4	2	5
219	10	6	6	7	7	7	7	4	6	5	4	4	7	6	6	4	7	5	7	7	6	6	6	5	3	4	5	3	3
219	10	5	6	6	5	7	7	7	6	5	8	5	6	6	7	7	7	7	4	4	7	6	7	6	4	4	6	4	4
220	10	6	6	6	7	6	6	7	5	5	7	6	5	7	5	6	5	5	5	6	5	6	5	7	4	4	3	3	4
220	10	7	6	5	5	6	7	6	7	5	7	5	6	6	7	7	5	5	5	6	6	7	7	6	5	3	4	6	6
220	10	7	6	5	7	5	6	7	6	5	5	7	6	7	6	7	6	7	7	6	5	5	6	7	4	3	3	5	3
221	10	5	7	6	5	7	5	7	6	7	5	5	6	5	4	6	4	6	6	5	6	6	6	5	4	5	4	4	3
221	10	5	7	7	5	6	6	6	5	6	7	5	6	7	7	7	6	6	6	5	7	5	7	6	5	2	2	4	3
221	10	7	4	6	5	7	6	7	6	6	7	7	7	7	5	7	6	7	6	7	5	6	6	7	6	6	4	4	4
222	10	7	6	6	4	7	5	7	6	6	6	6	6	7	6	4	6	6	7	6	7	6	6	5	3	4	5	3	3
222	10	6	6	6	4	6	5	7	7	7	4	5	7	7	7	7	6	5	7	6	6	5	6	7	5	4	4	5	5
222	10	6	5	6	7	7	7	7	5	4	6	4	6	6	6	6	7	6	6	6	6	6	5	7	4	4	4	3	4
223	10	7	6	5	5	6	7	6	5	6	6	7	4	7	6	7	5	7	5	6	6	5	6	5	6	3	4	4	5
223	10	6	6	6	7	6	5	6	7	6	6	6	7	4	7	6	5	4	7	4	5	6	6	7	5	2	5	5	3
223	10	6	6	6	7	6	5	7	6	5	7	7	7	6	7	5	7	6	7	5	7	6	7	6	5	3	5	2	3
224	6	4	6	5	4	5	5	2	3	6	7	6	7	6	6	5	5	6	6	7	7	7	7	7	5	6	6	4	6
224	6	5	5	6	5	4	4	4	3	3	6	7	5	7	5	6	6	5	7	6	7	7	7	7	4	5	5	4	5
224	6	5	5	4	4	6	4	4	3	3	6	5	6	6	6	5	6	7	5	7	7	7	7	7	4	6	4	6	5
225	6	5	5	5	5	3	3	3	4	4	5	7	5	5	7	6	7	7	6	5	7	7	7	7	5	4	5	5	5
225	6	5	4	6	3	6	4	5	3	2	6	6	6	5	6	7	4	5	7	7	7	7	7	7	4	5	5	7	6
225	6	5	5	5	6	5	5	6	2	3	6	7	7	7	5	7	5	7	4	6	7	7	7	7	4	5	6	4	5
226	6	5	5	5	3	3	5	3	5	5	7	5	7	7	7	5	5	6	7	7	7	7	7	7	5	4	4	6	5
226	6	6	5	5	4	3	3	4	5	5	7	7	7	5	5	5	5	5	6	7	7	7	7	7	4	4	4	4	5
226	6	4	6	4	3	5	3	5	3	5	5	5	7	5	7	6	6	7	5	5	7	7	7	7	7	7	7	4	5
227	10	7	6	5	7	7	7	7	7	7	3	6	6	6	4	4	6	4	4	5	7	7	7	7	5	3	6	4	6
227	10	6	5	7	7	7	7	7	7	7	6	5	4	6	7	5	4	5	5	4	7	7	7	7	3	3	5	3	3
227	10	7	4	7	7	7	7	7	7	7	5	6	5	5	5	6	4	6	4	5	7	7	7	7	4	3	4	2	6
228	10	6	5	6	7	7	7	7	7	7	4	3	5	3	6	4	4	5	7	6	7	7	7	7	4	4	3	3	5
228	10	6	7	7	7	7	7	7	7	7	6	5	4	3	5	5	5	6	7	6	7	7	7	7	3	3	6	5	3
228	10	5	6	6	7	7	7	7	7	7	5	4	5	4	4	5	6	6	6	6	7	7	7	7	5	4	5	3	4
229	10	5	5	7	7	7	7	7	7	7	5	4	4	6	7	4	6	3	4	5	7	7	7	7	5	3	5	6	4
229	10	7	7	6	7	7	7	7	7	7	4	5	4	7	3	6	6	6	4	6	7	7	7	7	4	2	3	6	3
229	10	6	6	5	7	7	7	7	7	7	5	3	5	5	6	5	6	6	4	6	7	7	7	7	5	5	2	5	2
230	10	7	7	7	7	7	7	7	7	7	6	6	6	4	6	7	3	4	3	5	7	7	7	7	4	4	2	5	4
230	10	5	6	5	7	7	7	7	7	7	7	5	5	4	5	5	4	6	4	5	7	7	7	7	5	3	3	5	4
230	10	7	5	5	7	7	7	7	7	7	6	4	4	5	6	3	6	6	6	4	7	7	7	7	5	3	3	6	4
231	10	5	6	6	7	7	7	7	7	7	6	5	5	6	6	7	5	5	5	5	7	7	7	7	5	5	3	2	4
231	10	6	5	7	7	7	7	7	7	7	4	4	7	4	4	4	4	6	6	6	7	7	7	7	4	6	5	5	2
231	10	6	7	6	7	7	7	7	7	7	7	3	6	3	4	6	4	6	4	3	7	7	7	7	3	4	5	3	4
232	6	7	7	5	6	4	7	7	6	5	7	7	7	7	7	7	7	7	7	7	5	7	7	6	7	6	7	5	5
232	6	6	6	5	5	7	7	6	6	7	7	7	7	7	7	7	7	7	7	7	6	5	5	7	6	7	5	7	6
232	6	4	6	7	5	6	4	6	7	7	7	7	7	7	7	7	7	7	7	7	7	6	5	6	7	6	5	6	5
233	6	4	7	6	6	7	6	6	4	6	7	7	7	7	7	7	7	7	7	7	6	5	5	7	6	6	6	4	7
233	6	5	5	6	7	7	5	7	4	7	7	7	7	7	7	7	7	7	7	7	6	5	5	7	6	7	7	7	4
233	6	7	7	7	7	4	6	7	6	6	7	7	7	7	7	7	7	7	7	7	7	5	7	7	6	5	6	7	6
234	6	6	5	6	6	5	7	7	7	5	7	7	7	7	7	7	7	7	7	7	7	5	6	6	5	7	6	7	6
234	6	4	7	6	6	5	7	7	5	5	7	7	7	7	7	7	7	7	7	7	5	7	5	7	6	7	6	4	6
234	6	7	6	7	5	6	5	7	7	6	7	7	7	7	7	7	7	7	7	7	5	7	5	7	6	4	7	6	7
235	6	4	5	4	6	5	5	5	7	6	7	7	5	6	5	7	7	7	7	5	6	6	6	7	6	7	7	5	6
235	6	5	6	6	7	5	7	7	6	5	6	5	6	7	7	6	5	5	6	6	6	5	5	7	6	4	3	4	6
235	6	5	5	5	6	6	7	5	6	7	7	5	6	6	6	6	6	6	6	4	6	7	6	5	4	4	4	5	4
236	6	4	6	6	7	7	5	5	7	5	7	7	6	7	6	5	5	6	5	6	7	7	6	5	6	5	4	6	5
236	6	4	5	6	4	6	6	6	7	6	7	7	7	4	5	5	7	7	6	5	6	5	5	7	7	4	5	6	4
236	6	4	5	5	5	6	7	6	7	6	5	7	6	7	5	7	5	6	5	7	6	7	6	5	6	5	4	3	5
237	6	4	4	4	6	7	6	7	5	5	5	5	5	7	7	6	7	7	7	5	7	6	5	7	4	5	5	5	6
237	6	6	6	6	7	5	6	6	7	6	5	6	5	6	6	6	6	6	5	7	6	5	6	5	6	5	4	5	6
237	6	6	4	5	7	4	6	7	6	5	7	5	7	6	5	6	6	6	6	7	6	6	7	6	5	5	5	4	5
238	6	5	4	6	4	4	6	4	4	5	7	7	7	7	7	6	4	6	4	5	7	5	5	7	4	4	2	3	4
238	6	6	4	5	4	6	3	6	6	3	5	5	4	5	7	5	6	7	7	6	7	5	7	6	3	5	5	5	6
238	6	5	6	4	4	6	7	7	5	6	7	6	7	7	7	4	7	7	6	5	6	7	6	4	4	3	5	3	4
239	6	6	6	4	4	4	6	5	4	5	6	5	7	5	6	5	6	5	7	7	5	6	7	5	4	3	2	5	2
239	6	5	4	5	5	6	6	5	5	4	7	6	7	6	7	7	7	5	6	7	7	5	5	7	5	3	3	4	5
239	6	6	6	3	6	4	6	6	4	5	5	7	6	5	4	7	5	6	5	6	6	6	7	6	3	5	6	5	5
240	6	5	6	5	4	4	6	4	7	7	5	7	7	6	7	5	5	5	5	7	6	6	5	6	4	6	3	2	5
240	6	5	4	5	5	3	6	5	6	3	7	5	7	7	7	7	6	4	7	6	6	5	7	6	4	3	6	6	3
240	6	5	5	5	3	4	5	5	7	6	7	6	5	4	5	5	5	7	7	7	5	7	6	7	4	4	4	3	3
241	10	5	7	6	6	6	7	6	5	7	5	4	7	5	6	7	7	7	7	5	7	7	7	7	3	2	4	4	3
241	10	7	5	7	5	6	5	7	7	5	7	5	5	7	6	7	6	7	7	5	5	5	5	5	5	3	2	4	3
241	10	6	6	5	5	7	7	6	5	6	5	6	6	5	5	5	5	5	8	8	7	6	5	6	1	4	1	1	5
242	10	6	6	6	4	7	7	7	5	7	7	5	7	5	7	5	6	7	6	7	7	6	5	6	3	4	2	4	4
242	10	6	7	7	6	7	6	5	6	7	7	5	6	7	4	7	4	5	7	7	7	6	7	5	1	3	4	4	4
242	10	5	6	5	6	4	7	7	5	5	5	6	7	6	7	5	5	6	7	5	5	7	5	6	2	1	4	3	2
243	10	6	7	5	5	4	7	5	6	7	5	6	7	7	7	7	7	6	6	7	6	6	7	7	2	2	3	4	4
243	10	6	6	5	6	6	7	4	6	7	5	7	7	5	6	6	5	7	5	5	6	5	6	7	1	2	5	2	3
243	10	7	6	6	7	7	6	6	6	6	5	6	7	6	7	5	4	4	6	7	6	5	5	6	4	2	4	4	3
244	10	6	5	6	7	6	7	7	5	5	6	6	5	7	5	5	7	6	6	5	5	6	6	5	4	2	2	3	4
244	10	5	7	5	6	4	6	7	5	6	6	5	7	5	5	5	7	7	6	5	5	7	6	6	3	3	3	3	3
244	10	7	6	7	7	7	6	5	6	6	6	6	6	7	7	6	6	6	7	7	7	7	6	6	3	4	2	3	3
245	10	5	6	6	6	6	6	4	7	5	6	7	7	7	7	7	5	7	7	7	7	7	5	6	3	2	2	2	4
245	10	5	6	6	4	6	5	7	6	7	6	4	6	5	5	7	5	7	6	6	5	7	7	5	5	3	3	1	3
245	10	6	7	7	4	7	7	7	7	7	5	6	5	7	6	7	5	4	4	7	5	6	6	6	5	1	5	2	4
246	6	5	3	4	3	5	4	4	5	3	2	4	2	4	3	3	1	2	2	4	6	4	5	5	4	3	3	4	5
246	6	4	5	5	5	2	3	5	2	5	1	4	2	2	4	3	1	1	2	5	5	7	4	4	6	4	5	3	2
246	6	3	4	3	4	4	5	6	4	3	5	4	2	3	5	5	3	4	4	3	5	5	6	4	6	5	3	4	3
247	6	4	4	3	5	4	5	6	4	3	4	2	4	2	2	4	2	2	3	2	5	4	6	6	2	5	2	4	5
247	6	5	4	4	5	4	2	3	5	3	3	3	3	3	2	2	4	2	3	4	7	3	6	3	4	2	4	5	4
247	6	4	4	4	4	2	5	5	3	4	4	5	4	3	3	3	3	3	3	3	5	6	6	3	5	4	5	5	4
248	6	5	4	3	5	5	6	5	3	4	2	4	2	4	2	2	3	4	5	2	4	3	3	6	4	5	4	5	3
248	6	5	5	3	3	3	4	4	4	4	2	2	3	3	3	3	4	2	4	3	6	5	5	6	3	5	4	2	4
248	6	5	3	3	3	3	3	6	3	4	3	2	4	2	4	4	2	5	2	3	6	6	6	4	4	3	5	5	4
249	6	6	3	4	4	5	7	5	6	4	4	7	5	7	5	7	4	7	7	7	6	4	4	6	6	6	4	6	5
249	6	5	5	6	6	6	3	6	4	6	7	7	4	5	5	6	5	6	6	5	5	5	6	5	4	7	4	6	7
249	6	5	5	6	4	4	4	7	6	3	6	5	7	7	7	7	7	7	6	5	7	4	3	5	3	4	5	5	3
250	6	3	4	5	5	7	6	4	4	4	4	7	6	7	6	7	5	7	7	6	4	5	5	5	6	4	5	5	5
250	6	6	6	6	4	5	5	6	7	4	7	7	6	4	6	5	5	5	5	6	6	3	5	6	7	4	4	5	5
250	6	4	5	6	6	5	4	5	6	3	7	7	4	5	7	6	7	7	6	6	3	7	5	6	6	4	5	4	6
251	6	6	7	6	5	5	7	3	4	6	6	5	6	7	5	7	7	7	7	7	6	4	4	4	6	7	4	6	3
251	6	4	4	6	4	6	6	4	4	5	5	5	5	5	7	7	5	7	5	7	7	4	4	7	5	6	6	4	4
251	6	3	4	5	7	6	5	4	5	4	5	7	5	7	6	6	5	5	5	7	7	4	5	4	4	3	6	6	5
252	8	7	7	7	7	7	7	7	7	7	7	5	7	7	5	6	6	6	5	7	7	7	7	7	7	7	7	7	7
252	8	7	7	7	7	7	7	7	7	7	6	6	7	7	6	5	5	5	7	5	7	7	7	7	7	7	7	7	7
252	8	7	7	7	7	7	7	7	7	7	6	5	7	7	5	5	7	5	6	7	7	7	7	7	7	7	7	7	7
253	8	7	7	7	7	7	7	7	7	7	7	5	7	6	7	5	6	5	6	7	7	7	7	7	7	7	7	7	7
253	8	7	7	7	7	7	7	7	7	7	5	7	5	5	7	7	5	7	6	7	7	7	7	7	7	7	7	7	7
253	8	7	7	7	7	7	7	7	7	7	7	5	4	7	5	7	6	7	5	5	7	7	7	7	7	7	7	7	7
254	8	7	7	7	7	7	7	7	7	7	5	7	6	6	7	7	6	6	7	7	7	7	7	7	7	7	7	7	7
254	8	7	7	7	7	7	7	7	7	7	7	5	7	6	6	7	5	6	6	7	7	7	7	7	7	7	7	7	7
254	8	7	7	7	7	7	7	7	7	7	5	5	4	5	5	6	5	6	6	7	7	7	7	7	7	7	7	7	7
255	8	7	7	7	7	7	7	7	7	7	5	7	5	7	5	6	7	7	6	5	7	7	7	7	7	7	7	7	7
255	8	7	7	7	7	7	7	7	7	7	6	7	7	7	5	7	6	7	5	5	7	7	7	7	7	7	7	7	7
255	8	7	7	7	7	7	7	7	7	7	7	5	5	5	5	6	7	7	7	4	7	7	7	7	7	7	7	7	7
256	6	7	5	5	4	5	3	4	3	5	4	6	5	3	4	5	5	5	3	3	5	4	5	5	3	2	4	3	2
256	6	5	5	4	3	6	4	3	5	3	6	4	5	3	3	4	4	4	3	3	3	5	6	7	2	2	2	2	3
256	6	4	5	5	3	5	5	3	3	5	4	3	4	5	3	4	4	3	4	4	4	7	6	3	3	4	4	5	4
257	6	7	5	4	5	3	3	3	5	3	3	5	5	2	4	5	5	5	3	3	7	4	4	4	2	1	4	1	4
257	6	5	6	5	5	3	5	3	5	4	6	3	5	5	3	4	4	4	3	3	6	5	4	6	5	3	5	1	4
257	6	4	5	4	4	5	3	4	3	6	3	3	5	5	3	5	4	4	4	4	7	4	3	6	3	2	4	4	2
258	6	6	5	5	5	3	5	4	5	5	5	5	5	2	4	5	5	5	3	3	5	6	4	5	4	2	2	4	4
258	6	5	4	5	3	3	3	4	5	3	5	6	5	2	3	4	4	4	3	3	5	4	3	5	4	5	2	3	4
258	6	6	4	5	5	3	5	4	4	3	5	3	4	5	3	4	4	3	4	4	5	6	6	6	4	2	1	3	1
259	6	6	6	6	7	6	5	7	5	7	4	4	6	6	4	5	6	5	4	5	6	5	7	7	2	2	1	2	1
259	6	7	8	6	5	6	6	6	7	6	6	4	6	4	6	4	4	6	4	5	6	7	6	5	1	3	2	3	2
259	6	5	4	6	4	7	6	7	5	6	4	4	6	4	4	7	5	6	6	6	6	7	5	5	1	4	1	3	2
260	6	7	6	5	7	6	5	5	4	4	6	5	6	7	3	5	5	3	4	4	5	5	5	7	1	3	2	1	3
260	6	6	6	5	7	6	7	7	7	7	4	4	3	7	7	4	7	6	6	3	6	6	7	5	2	2	2	1	3
260	6	7	7	5	5	7	7	5	6	6	3	7	4	5	6	5	4	7	5	5	7	5	7	7	2	1	1	2	4
261	6	7	5	5	5	6	5	6	7	7	6	4	5	6	5	6	3	5	6	5	7	5	7	6	3	1	2	2	3
261	6	6	5	7	6	6	7	4	6	7	4	5	4	6	5	3	6	5	5	7	6	5	6	6	2	2	1	2	1
261	6	7	5	7	7	7	6	4	7	5	4	7	6	5	3	5	6	5	4	4	6	5	6	7	1	4	1	1	4
262	6	5	6	6	5	4	2	3	5	3	2	4	4	4	3	1	3	3	3	2	7	7	7	7	7	7	7	7	7
262	6	5	6	7	5	4	3	5	4	5	2	4	5	2	2	3	5	2	2	3	7	7	7	7	7	7	7	7	7
262	6	7	6	6	4	6	3	3	5	3	3	3	2	3	3	5	3	3	3	3	7	7	7	7	7	7	7	7	7
263	6	6	5	6	4	5	6	2	2	5	4	2	1	2	3	2	4	3	2	5	7	7	7	7	7	7	7	7	7
263	6	5	6	7	4	3	4	4	3	3	2	4	4	4	1	5	3	1	4	4	7	7	7	7	7	7	7	7	7
263	6	6	6	7	5	6	3	4	4	5	2	2	5	4	2	5	3	2	2	3	7	7	7	7	7	7	7	7	7
264	6	6	6	4	6	2	4	5	5	4	2	3	5	4	3	3	5	3	3	5	7	7	7	7	7	7	7	7	7
264	6	7	6	6	4	5	3	3	3	4	3	3	2	1	4	4	5	2	2	2	7	7	7	7	7	7	7	7	7
264	6	5	7	7	4	4	3	6	3	4	2	2	3	2	4	3	3	3	2	2	7	7	7	7	7	7	7	7	7
265	6	5	4	4	5	5	4	4	5	6	6	4	6	4	6	5	4	6	4	4	7	7	5	5	4	6	6	6	4
265	6	4	5	5	6	6	4	6	5	5	4	6	4	4	7	4	5	5	4	5	7	5	5	6	6	4	4	4	6
265	6	3	3	3	4	7	5	5	4	4	4	7	3	5	6	6	6	6	4	6	6	6	7	6	6	5	6	4	4
266	6	4	4	4	6	6	7	5	3	5	4	6	5	6	5	6	3	5	7	6	6	6	7	5	4	6	5	4	5
266	6	3	3	5	4	6	5	5	4	6	4	6	3	3	6	5	3	4	3	7	5	6	6	7	5	5	6	3	5
266	6	4	4	5	6	5	5	5	4	3	5	6	6	6	5	5	5	5	4	6	6	7	5	6	6	3	7	5	6
267	6	4	3	2	4	4	6	5	5	6	7	4	5	6	4	6	4	5	4	5	7	5	6	6	6	4	4	4	7
267	6	5	6	3	5	5	6	6	4	4	4	4	4	5	6	4	5	6	7	5	7	5	6	6	7	4	7	7	4
267	6	4	4	5	6	4	4	7	5	4	4	4	6	6	4	4	6	5	4	7	6	6	6	6	5	4	5	4	3
268	6	7	5	7	2	2	3	4	3	4	4	5	7	7	7	5	7	6	7	7	7	6	6	6	4	5	4	4	4
268	6	5	4	5	2	2	2	2	4	4	6	5	4	5	4	6	6	7	6	5	5	6	7	6	5	2	4	4	4
268	6	7	7	7	3	2	3	3	4	5	6	7	6	6	6	8	7	7	5	6	5	6	7	5	5	3	5	4	3
269	6	7	5	5	3	5	3	2	2	2	5	6	5	6	7	7	5	6	7	7	5	7	6	6	4	5	3	3	3
269	6	7	6	7	3	2	2	4	3	3	7	5	5	6	7	5	7	6	5	7	4	6	4	6	6	4	5	3	3
269	6	6	6	5	3	4	4	2	5	2	7	5	5	7	6	6	6	6	4	7	7	7	7	7	5	5	4	3	4
270	6	7	6	6	5	4	4	2	2	3	6	7	5	7	5	6	7	7	5	6	6	7	6	5	4	4	3	3	6
270	6	5	6	5	2	2	3	3	2	4	7	5	6	7	5	5	6	5	7	6	6	6	6	7	3	4	5	3	4
270	6	6	6	7	2	4	2	4	3	3	6	6	7	5	6	6	6	6	5	7	6	7	5	5	4	5	4	3	5
271	10	7	6	5	6	7	4	4	4	5	6	5	4	4	5	4	6	7	4	5	4	5	6	4	5	6	5	6	7
271	10	7	5	6	4	7	4	6	5	4	4	6	6	5	4	5	4	6	5	6	3	5	4	3	5	5	6	6	5
271	10	6	7	5	5	4	7	4	5	5	6	6	5	5	3	5	6	6	3	4	4	4	3	3	7	7	6	7	7
272	10	4	7	7	4	7	3	4	6	4	3	5	5	4	6	5	6	4	5	5	5	4	2	4	5	7	6	6	7
272	10	6	6	5	3	4	6	6	6	5	6	6	7	6	3	5	7	7	3	5	4	5	4	2	7	6	4	7	5
272	10	6	7	6	7	5	5	4	6	5	4	4	6	7	4	3	5	7	4	3	4	5	5	4	7	6	7	6	4
273	10	6	4	4	3	5	4	4	5	7	6	4	6	6	4	4	5	5	6	4	4	4	4	3	5	7	6	6	5
273	10	7	7	7	4	6	5	5	7	5	5	4	5	4	5	4	4	6	7	6	4	4	4	4	6	6	7	5	6
273	10	7	5	7	6	3	4	6	4	7	4	6	6	5	6	6	5	4	5	3	3	6	4	4	6	5	7	6	7
274	10	6	6	7	5	7	6	5	5	4	5	5	5	6	5	4	5	5	6	7	5	6	4	2	7	7	7	7	6
274	10	6	5	6	6	5	5	6	3	4	7	4	4	5	5	5	4	5	5	5	3	4	3	3	7	7	5	5	5
274	10	6	6	6	5	5	5	5	3	6	4	6	5	6	4	5	5	4	5	4	6	3	6	3	4	6	6	6	5
275	10	5	6	6	5	4	6	6	5	4	4	6	6	3	6	5	4	5	5	5	4	5	3	4	6	7	5	7	5
275	10	5	6	6	4	5	5	6	7	5	4	5	4	6	7	6	3	5	4	6	4	4	4	4	4	6	6	5	7
275	10	7	6	7	6	4	5	4	5	4	4	5	6	5	4	6	5	6	6	4	4	4	5	3	6	7	6	6	7
276	10	7	7	7	6	7	6	5	7	6	7	7	7	7	7	7	7	7	7	7	5	6	7	5	1	1	1	1	1
276	10	7	7	7	7	7	5	5	5	7	7	7	7	7	7	7	7	7	7	7	5	6	6	7	1	1	1	1	1
276	10	7	7	7	5	6	5	5	6	8	7	7	7	7	7	7	7	7	7	7	6	7	6	6	1	1	1	1	1
277	10	7	7	7	7	4	6	7	7	6	7	7	7	7	7	7	7	7	7	7	7	6	6	6	1	1	1	1	1
277	10	7	7	7	7	6	7	5	7	4	7	7	7	7	7	7	7	7	7	7	6	5	6	5	1	1	1	1	1
277	10	7	7	7	7	6	6	4	7	5	7	7	7	7	7	7	7	7	7	7	6	6	6	7	1	1	1	1	1
278	10	7	7	7	7	7	7	5	4	6	7	7	7	7	7	7	7	7	7	7	5	7	6	7	1	1	1	1	1
278	10	7	7	7	7	7	7	7	4	4	7	7	7	7	7	7	7	7	7	7	5	6	7	6	1	1	1	1	1
278	10	7	7	7	7	6	5	7	5	6	7	7	7	7	7	7	7	7	7	7	6	5	6	6	1	1	1	1	1
279	10	7	7	7	5	4	7	6	7	7	7	7	7	7	7	7	7	7	7	7	6	5	6	7	1	1	1	1	1
279	10	7	7	7	6	6	7	7	5	4	7	7	7	7	7	7	7	7	7	7	7	5	6	6	1	1	1	1	1
279	10	7	7	7	5	6	5	7	6	8	7	7	7	7	7	7	7	7	7	7	5	7	5	7	1	1	1	1	1
280	10	7	7	7	6	7	6	7	7	6	7	7	7	7	7	7	7	7	7	7	4	6	7	7	1	1	1	1	1
280	10	7	7	7	5	5	6	7	7	6	7	7	7	7	7	7	7	7	7	7	7	6	7	5	1	1	1	1	1
280	10	7	7	7	4	6	6	5	7	5	7	7	7	7	7	7	7	7	7	7	5	7	5	6	1	1	1	1	1
281	8	7	7	7	6	5	5	5	6	6	5	6	4	5	4	5	5	4	7	5	6	5	4	4	7	7	7	7	7
281	8	7	7	7	6	5	7	6	7	7	7	4	4	4	5	6	6	5	4	4	6	4	6	3	7	7	7	7	7
281	8	7	7	7	5	7	6	6	6	7	5	5	4	5	6	6	4	3	7	6	5	5	6	6	7	7	7	7	7
282	8	7	7	7	6	6	6	7	6	6	4	6	6	5	4	6	5	5	6	4	4	6	5	5	7	7	7	7	7
282	8	7	7	7	7	6	7	6	4	5	4	3	5	5	5	5	3	6	4	5	5	4	4	6	7	7	7	7	7
282	8	7	7	7	7	7	7	4	6	5	7	5	5	5	5	6	6	5	6	4	6	5	5	5	7	7	7	7	7
283	8	7	7	7	7	6	7	4	7	6	5	4	4	6	6	5	4	4	5	6	7	4	5	4	7	7	7	7	7
283	8	7	7	7	7	6	5	5	5	6	4	5	7	4	6	6	5	5	7	6	5	5	6	5	7	7	7	7	7
283	8	7	7	7	6	7	4	7	6	7	4	6	5	5	6	3	4	3	5	5	6	4	5	4	7	7	7	7	7
284	8	7	7	7	5	7	5	6	6	6	5	6	6	7	4	4	5	4	7	6	4	5	6	5	7	7	7	7	7
284	8	7	7	7	7	4	7	6	5	6	4	7	5	5	7	5	4	4	4	5	5	4	4	4	7	7	7	7	7
284	8	7	7	7	7	4	7	7	7	6	6	7	3	3	4	7	3	4	4	5	6	5	6	6	7	7	7	7	7
285	6	6	5	4	7	7	7	7	7	7	4	5	5	5	3	5	5	5	3	3	7	5	6	6	4	2	3	3	4
285	6	5	6	4	7	7	7	7	7	7	3	3	5	5	3	4	4	3	3	3	7	6	5	6	1	3	1	4	3
285	6	6	6	3	7	7	7	7	7	7	4	3	4	5	5	4	4	4	4	4	6	7	5	6	4	4	1	4	4
286	6	4	5	4	7	7	7	7	7	7	5	3	5	4	4	5	5	5	3	3	7	7	5	5	2	4	2	4	3
286	6	7	5	5	7	7	7	7	7	7	4	3	5	4	3	4	4	5	3	3	6	5	6	5	3	4	2	2	4
286	6	6	5	4	7	7	7	7	7	7	5	3	4	5	3	4	4	4	4	4	6	7	7	6	3	4	2	2	4
287	6	5	4	4	7	7	7	7	7	7	4	4	4	5	4	5	5	5	3	3	7	7	7	4	3	1	1	2	5
287	6	4	6	6	7	7	7	7	7	7	3	5	5	4	3	4	4	5	3	3	7	4	7	4	2	4	2	3	5
287	6	4	7	5	7	7	7	7	7	7	3	5	4	5	3	4	4	3	4	4	7	7	4	7	2	3	3	4	5
288	6	7	7	7	3	2	2	4	2	2	7	7	7	7	7	7	7	7	7	7	7	7	7	7	7	7	7	7	7
288	6	7	7	7	3	4	3	3	4	5	7	7	7	7	7	7	7	7	7	7	7	7	7	7	7	7	7	7	7
288	6	7	7	7	2	2	2	2	5	4	7	7	7	7	7	7	7	7	7	7	7	7	7	7	7	7	7	7	7
289	6	7	7	7	5	2	2	2	4	2	7	7	7	7	7	7	7	7	7	7	7	7	7	7	7	7	7	7	7
289	6	7	7	7	2	4	4	2	4	4	7	7	7	7	7	7	7	7	7	7	7	7	7	7	7	7	7	7	7
289	6	7	7	7	4	4	2	2	2	3	7	7	7	7	7	7	7	7	7	7	7	7	7	7	7	7	7	7	7
290	6	7	7	7	3	4	3	4	4	3	7	7	7	7	7	7	7	7	7	7	7	7	7	7	7	7	7	7	7
290	6	7	7	7	3	3	2	2	2	3	7	7	7	7	7	7	7	7	7	7	7	7	7	7	7	7	7	7	7
290	6	7	7	7	2	4	4	4	2	2	7	7	7	7	7	7	7	7	7	7	7	7	7	7	7	7	7	7	7
290	6	7	7	7	3	3	3	3	3	3	7	7	7	7	7	7	7	7	7	7	7	7	7	7	7	7	7	7	7
